# Supplementary material for: Bu4NI-catalyzed direct α-oxyacylation of diarylethanones with acyl peroxides
Source: Royal Society of Chemistry journal article supplement (doi:10.1039/c5ob01534k), 2015-01-01

# Supplementary Information

## Bu<sub>4</sub>Ni-catalyzed direct $\alpha$ -oxyacylation of diarylethanones with acyl peroxides

Zhou Zhou, Jiang Cheng and Jin-Tao Yu\*

*School of Petrochemical Engineering, Jiangsu Key Laboratory of Advanced Catalytic Materials & Technology, Jiangsu Province Key Laboratory of Fine Petrochemical Engineering, Changzhou University, Changzhou 213164, P. R. China*

*Email: [yujintao@cczu.edu.cn](mailto:yujintao@cczu.edu.cn)*

### Table of Contents

|                                                                          |                |
|--------------------------------------------------------------------------|----------------|
| <b>1. General Considerations</b>                                         | <b>S2</b>      |
| <b>2. Experimental Procedures</b>                                        | <b>S2</b>      |
| <b>3. Mechanism Studies</b>                                              | <b>S2-S4</b>   |
| <b>4. Characterization Data for the Products</b>                         | <b>S5-S13</b>  |
| <b>5. References</b>                                                     | <b>S14</b>     |
| <b>6. Copies of the <sup>1</sup>H NMR and <sup>13</sup>C NMR Spectra</b> | <b>S15-S39</b> |

## 1. General Considerations

Unless otherwise noted, all chemicals were purchased from commercial suppliers (Adamas, Aladdin, etc) and used without further purification. Acyl peroxides were synthesized according to the literature (W. Y. Yu, W. N. Sit, Z. Zhou and A. S. C. Chan, *Org. Lett.*, 2009, **11**, 3174.). <sup>1</sup>H NMR and <sup>13</sup>C NMR spectra were recorded at ambient temperature on a 400 MHz NMR spectrometer (100 MHz for <sup>13</sup>C). NMR experiments are reported in  $\delta$  units, parts per million (ppm), and were referenced to CDCl<sub>3</sub> ( $\delta$  7.26 or 77.0 ppm) as the internal standard. The coupling constants *J* are given in Hz. Column chromatography was performed using EM Silica gel 60 (300-400 mesh). HRMS were recorded on a TOF LC/MS equipped with electrospray ionization (ESI) probe operating in positive or negative ion mode.

## 2. Experimental Procedures.

Under N<sub>2</sub>, a Schlenk tube equipped with a stir bar was charged with diarylethanone **1** (0.2 mmol), acyl peroxide **2** (0.2 mmol, 1 equiv.), Bu<sub>4</sub>NI (14.8 mg, 20 mol%) and 1,4-dioxane (2 mL) and sealed. The reaction mixture was stirred at room temperature for 12 h. After the completion of the reaction, the solvent was concentrated in vacuum and the residue was purified by flash column chromatography on silica gel with petroleum ether-EtOAc as the eluent to give the desired product.

## 3. Mechanism Studies.

Under N<sub>2</sub>, a Schlenk tube equipped with a stir bar was charged with 1,2-diphenylethanone **1a** (0.2 mmol), benzoyl peroxide **2a** (0.2 mmol, 1 equiv.), Bu<sub>4</sub>NI (14.8 mg, 20 mol%), TEMPO (62.5 mg, 0.4 mmol, 2 equiv.) (or BHT (0.8 mmol, 4 equiv.)) in 1,4-dioxane (2 mL) and sealed. The reaction mixture was stirred at room temperature for 12 h. The mixture was analyzed using GC-MS spectrometer, as shown in Figure S2, no product of **3aa** was detected.

### Standard Procedure

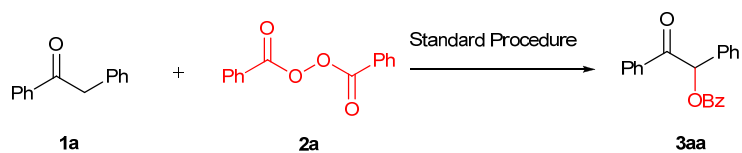

GC

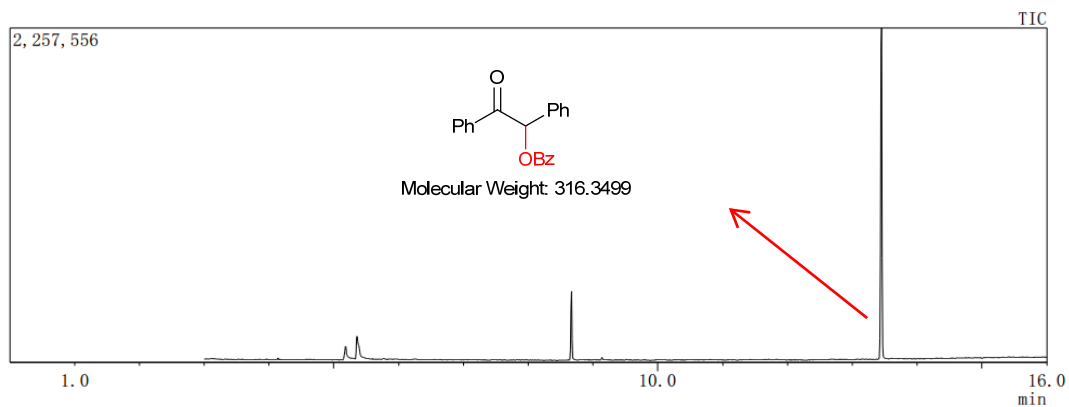

MS (Residual time of 3aa: 13.450 min)

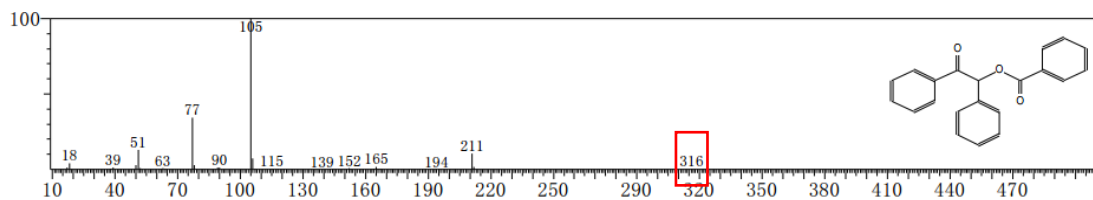

Figure S1 GC-MS spectra of the standard procedure results

Standard Procedure + TEMPO (2.0 equiv)

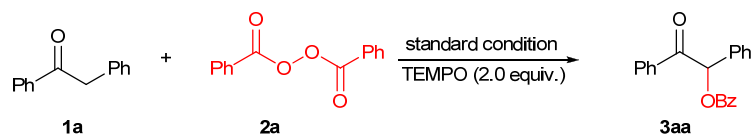

GC

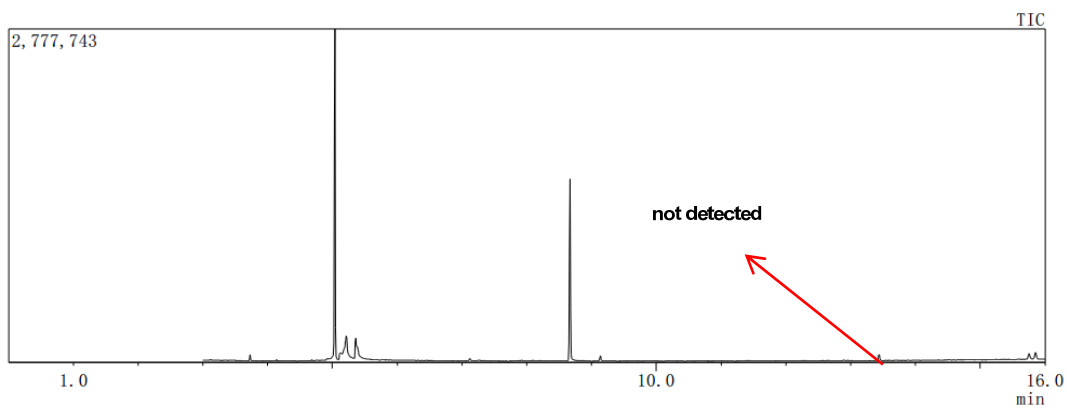

Figure S2 GC spectra of the free radical capture results

**Standard Procedure + BHT (4.0 equiv)**

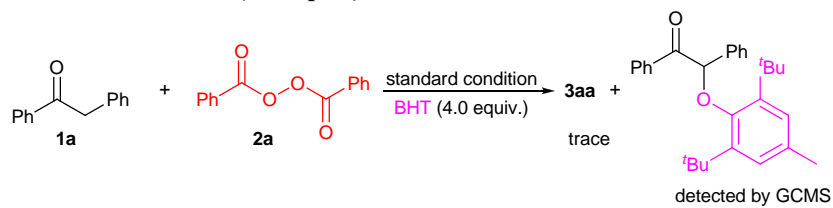

**GC**

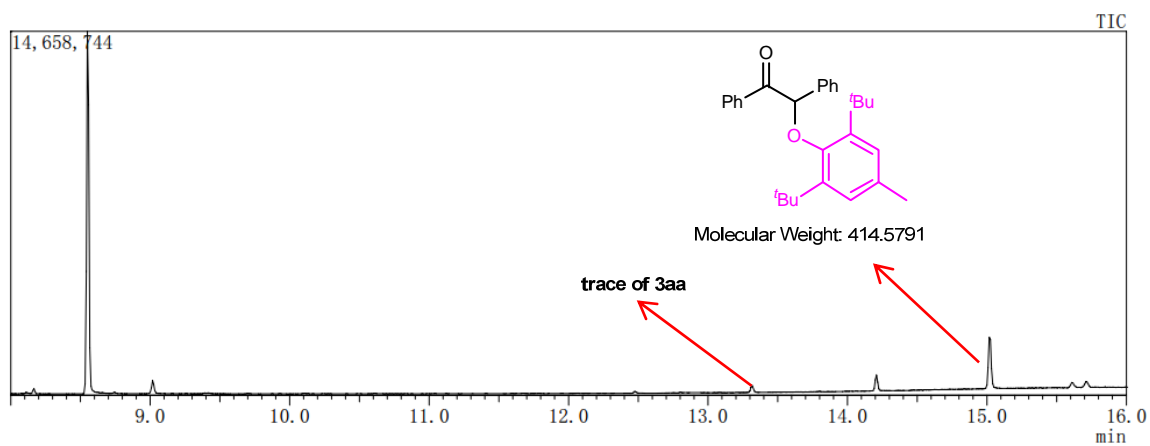

**MS (Residual time of adduct: 15.017 min)**

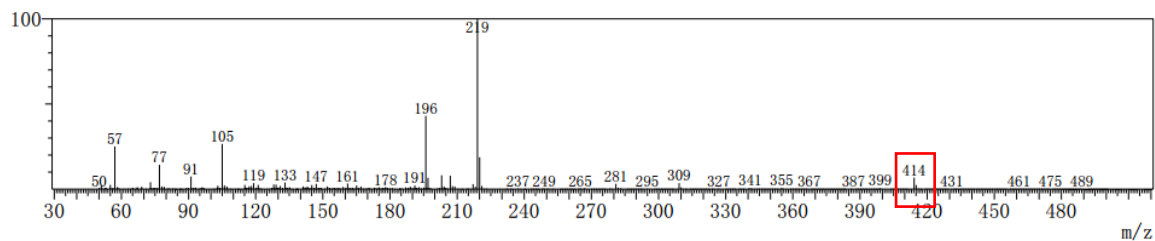

**Figure S3** GC-MS spectra of the free radical capture results

#### 4. Characterization Data for the Products

##### 2-oxo-1,2-diphenylethyl benzoate (**3aa**)<sup>1</sup>

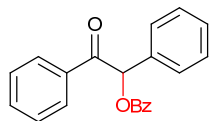

Flash column chromatography on silica gel (ethyl acetate/petroleum ether 1:40) gave **3aa** (55.6mg, 88% yield) as a white solid. <sup>1</sup>H NMR (CDCl<sub>3</sub>, 400 MHz): δ 8.15 (d, *J* = 7.4 Hz, 2H), 8.03 (d, *J* = 7.5 Hz, 2H), 7.61-7.51 (m, 4H), 7.47-7.35 (m, 7H), 7.12 (s, 1H). <sup>13</sup>C NMR (CDCl<sub>3</sub>, 100 MHz): δ 193.6, 166.0, 134.6, 133.7, 133.5, 133.3, 129.9, 129.3, 129.3, 129.1, 128.8, 128.6, 128.6, 128.4, 77.9.

##### 2-(4-methoxyphenyl)-2-oxo-1-phenylethyl benzoate (**3ba**)<sup>2</sup>

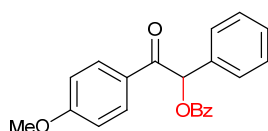

Flash column chromatography on silica gel (ethyl acetate/petroleum ether 1:20) gave **3ba** (51.9 mg, 75% yield) as a yellow solid. <sup>1</sup>H NMR (CDCl<sub>3</sub>, 400 MHz): δ 8.13 (d, *J* = 7.2 Hz, 2H), 8.01 (d, *J* = 8.9 Hz, 2H), 7.59-7.55 (m, 3H), 7.46-7.38 (m, 5H), 7.08 (s, 1H), 6.90 (d, *J* = 8.9 Hz, 2H), 3.82 (s, 3H). <sup>13</sup>C NMR (CDCl<sub>3</sub>, 100 MHz): δ 192.0, 166.0, 163.8, 134.2, 133.3, 131.2, 130.0, 129.5, 129.2, 129.1, 128.6, 128.3, 127.5, 113.9, 77.6, 55.4.

##### 2-(4-chlorophenyl)-2-oxo-1-phenylethyl benzoate (**3ca**)<sup>2</sup>

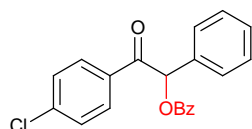

Flash column chromatography on silica gel (ethyl acetate/petroleum ether 1:40) gave **3ca** (56.7 mg, 81% yield) as a white solid. <sup>1</sup>H NMR (CDCl<sub>3</sub>, 400 MHz): δ 8.13 (d, *J* = 7.3 Hz, 2H), 7.95 (d, *J* = 8.6 Hz, 2H), 7.60-7.56 (m, 3H), 7.47-7.38 (m, 7H), 7.04 (s, 1H). <sup>13</sup>C NMR (CDCl<sub>3</sub>, 100 MHz): δ 192.6, 166.0, 139.9, 133.4, 133.4, 132.9, 130.2, 129.9, 129.4, 129.2, 129.2, 129.0, 128.6, 128.4, 77.9.

##### 2-(4-fluorophenyl)-2-oxo-1-phenylethyl benzoate (**3da**)

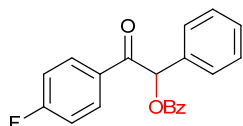

Flash column chromatography on silica gel (ethyl acetate/petroleum ether 1:40) gave **3da** (47.4 mg, 71% yield) as a white solid. Mp. 97-99 °C. <sup>1</sup>H NMR (CDCl<sub>3</sub>, 400 MHz): δ 8.13 (d, *J* = 7.2 Hz, 2H), 8.07-8.03 (m, 2H), 7.59-7.57 (m, 3H), 7.47-7.36 (m, 5H), 7.12-7.06 (m, 3H). <sup>13</sup>C NMR (CDCl<sub>3</sub>, 100 MHz): δ 192.2, 165.9 (d, *J*<sub>C-F</sub> = 254.4 Hz), 133.6, 133.5, 131.6 (d, *J*<sub>C-F</sub> = 9.4 Hz), 131.1 (d, *J*<sub>C-F</sub> = 3.1 Hz), 130.0, 129.5, 129.3, 129.3, 128.7, 128.5, 116.1, 115.8, 77.9. HRMS (ESI) *m/z* calcd for C<sub>21</sub>H<sub>15</sub>FNaO<sub>3</sub> (M+Na)<sup>+</sup> 357.0897, found 357.0898. IR (KBr) ν 3063, 2925, 2853, 1708, 1690, 1286, 1242, 1229, 1114 cm<sup>-1</sup>.

### 2-oxo-1-phenyl-2-(4-(trifluoromethyl)phenyl)ethyl benzoate (**3ea**)

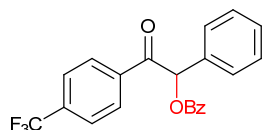

Flash column chromatography on silica gel (ethyl acetate/petroleum ether 1:40) gave **3ea** (66.8 mg, 87% yield) as a white solid. Mp. 71-72 °C. <sup>1</sup>H NMR (CDCl<sub>3</sub>, 400 MHz): δ 8.13-8.09 (m, 4H), 7.69 (d, *J* = 8.3 Hz, 2H), 7.61-7.56 (m, 3H), 7.48-7.38 (m, 5H), 7.05 (s, 1H). <sup>13</sup>C NMR (CDCl<sub>3</sub>, 100 MHz): δ 193.0, 166.0, 137.5, 134.8, 133.5, 133.0, 130.0, 129.6, 129.3, 129.1, 129.1, 129.1, 128.6, 128.5, 125.7 (q, *J*<sub>C-F</sub> = 3.8 Hz), 78.1. HRMS (ESI) *m/z* calcd for C<sub>22</sub>H<sub>15</sub>F<sub>3</sub>NaO<sub>3</sub> (M+Na)<sup>+</sup> 407.0866, found 407.0867. IR (KBr) ν 3065, 2922, 2851, 1715, 1698, 1326, 1283, 1250, 1180, 1170, 1114, 1067 cm<sup>-1</sup>.

### 2-(3-nitrophenyl)-2-oxo-1-phenylethyl benzoate (**3fa**)

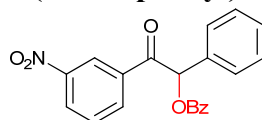

Flash column chromatography on silica gel (ethyl acetate/petroleum ether 1:20) gave **3fa** (60.6 mg, 84% yield) as a white solid. Mp. 115-116 °C. <sup>1</sup>H NMR (CDCl<sub>3</sub>, 400 MHz): δ 8.85 (s, 1H), 8.37 (d, *J* = 8.2 Hz, 1H), 8.31 (d, *J* = 7.8 Hz, 1H), 8.12 (d, *J* = 7.1 Hz, 2H), 7.65-7.58 (m, 4H), 7.48-7.39 (m, 5H), 7.06 (s, 1H). <sup>13</sup>C NMR (CDCl<sub>3</sub>, 100 MHz): δ 191.9, 166.0, 148.3, 135.8, 134.2, 133.6, 132.6, 130.0, 129.9, 129.8, 129.4, 128.9, 128.6, 128.5, 127.6, 123.7, 78.1. HRMS (ESI) *m/z* calcd for

$C_{21}H_{15}NNaO_5(M+Na)^+$  384.0842, found 384.0842. IR (KBr)  $\nu$  3066, 2924, 2855, 1733, 1702, 1536, 1494, 1344, 1284, 1253, 1220, 1108, 1089, 1071  $cm^{-1}$ .

### 2-oxo-1-phenyl-2-(o-tolyl)ethyl benzoate (3ga)

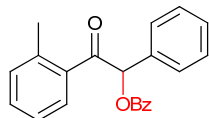

Flash column chromatography on silica gel (ethyl acetate/petroleum ether 1:40) gave **3ga** (46.9 mg, 71% yield) as a yellow solid. Mp. 114-115 °C.  $^1H$  NMR ( $CDCl_3$ , 400 MHz):  $\delta$  8.15 (d,  $J = 7.1$  Hz, 2H), 7.82 (d,  $J = 7.6$  Hz, 1H), 7.59-7.55 (m, 1H), 7.49-7.43 (m, 4H), 7.38-7.31 (m, 4H), 7.26-7.22 (m, 1H), 7.15 (d,  $J = 7.5$  Hz, 1H), 6.88 (s, 1H), 2.21 (s, 3H).  $^{13}C$  NMR ( $CDCl_3$ , 100 MHz):  $\delta$  197.4, 166.1, 138.4, 136.1, 133.3, 132.9, 131.5, 131.4, 130.0, 129.4, 129.1, 128.9, 128.4, 128.2, 128.1, 125.5, 79.8, 20.1. HRMS (ESI)  $m/z$  calcd for  $C_{22}H_{18}NaO_3 (M+Na)^+$  353.1148, found 353.1149. IR (KBr)  $\nu$  3065, 2963, 2927, 1709, 1694, 1281, 1243, 1118  $cm^{-1}$ .

### 2-oxo-1-phenyl-2-(m-tolyl)ethyl benzoate (3ha)

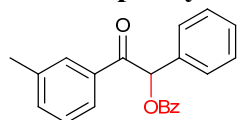

Flash column chromatography on silica gel (ethyl acetate/petroleum ether 1:40) gave **3ha** (40.9 mg, 62% yield) as a yellow solid. Mp. 124-125 °C.  $^1H$  NMR ( $CDCl_3$ , 400 MHz):  $\delta$  8.14 (d,  $J = 7.4$  Hz, 2H), 7.82 (d,  $J = 12.2$  Hz, 2H), 7.60-7.56 (m, 3H), 7.47-7.29 (m, 7H), 7.11 (s, 1H), 2.37 (s, 3H).  $^{13}C$  NMR ( $CDCl_3$ , 100 MHz):  $\delta$  193.9, 166.0, 138.5, 134.7, 134.3, 133.8, 133.3, 129.9, 129.4, 129.3, 129.2, 129.1, 128.6, 128.5, 128.4, 126.0, 77.8, 21.3. HRMS (ESI)  $m/z$  calcd for  $C_{25}H_{18}NaO_3 (M+Na)^+$  353.1148, found 353.1147. IR (KBr)  $\nu$  3067, 3037, 2962, 2920, 2855, 1720, 1638, 1277, 1262, 1239, 1108  $cm^{-1}$ .

### 2-(3,5-dimethylphenyl)-2-oxo-1-phenylethyl benzoate (3ia)

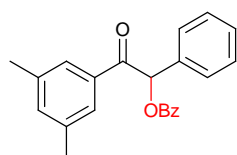

Flash column chromatography on silica gel (ethyl acetate/petroleum ether 1:40) gave

**3ia** (39.2 mg, 57% yield) as a yellow solid.  $^1\text{H}$  NMR ( $\text{CDCl}_3$ , 400 MHz):  $\delta$  8.14 (d,  $J = 7.2$  Hz, 2H), 7.63 (s, 2H), 7.60-7.56 (m, 3H), 7.47-7.34 (m, 5H), 7.17 (s, 1H), 7.10 (s, 1H), 2.33 (s, 6H).  $^{13}\text{C}$  NMR ( $\text{CDCl}_3$ , 100 MHz):  $\delta$  194.1, 166.0, 138.3, 135.2, 134.8, 133.9, 133.3, 129.9, 129.4, 129.2, 129.0, 128.6, 128.3, 126.6, 77.8, 21.2. HRMS (ESI)  $m/z$  calcd for  $\text{C}_{23}\text{H}_{20}\text{NaO}_3$  ( $\text{M}+\text{Na}$ ) $^+$  367.1305, found 367.1304. IR (KBr)  $\nu$  3051, 2955, 2919, 1719, 1692, 1600, 1452, 1282, 1273, 1246, 1108, 1096  $\text{cm}^{-1}$ .

### 2-(naphthalen-1-yl)-2-oxo-1-phenylethyl benzoate (**3ja**)

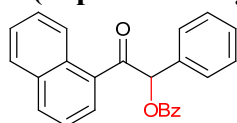

Flash column chromatography on silica gel (ethyl acetate/petroleum ether 1:40) gave **3ja** (47.6 mg, 65% yield) as a white solid. Mp. 142-143  $^\circ\text{C}$ .  $^1\text{H}$  NMR ( $\text{CDCl}_3$ , 400 MHz):  $\delta$  8.26 (d,  $J = 8.2$  Hz, 1H), 8.17 (d,  $J = 7.8$  Hz, 2H), 8.06 (d,  $J = 7.1$  Hz, 1H), 7.91 (d,  $J = 8.2$  Hz, 1H), 7.78 (d,  $J = 7.4$  Hz, 1H), 7.58-7.42 (m, 8H), 7.32-7.27 (m, 3H), 7.07 (s, 1H).  $^{13}\text{C}$  NMR ( $\text{CDCl}_3$ , 100 MHz):  $\delta$  197.1, 166.1, 134.0, 133.7, 133.4, 133.0, 132.7, 130.5, 129.9, 129.4, 129.1, 129.0, 128.4, 128.2, 128.2, 127.9, 127.6, 126.5, 125.2, 124.2, 80.1. HRMS (ESI)  $m/z$  calcd for  $\text{C}_{25}\text{H}_{18}\text{NaO}_3$  ( $\text{M}+\text{Na}$ ) $^+$  389.1148, found 389.1148. IR (KBr)  $\nu$  3084, 3057, 3008, 2925, 2855, 1698, 1281, 1242, 1115, 1097  $\text{cm}^{-1}$ .

### 1-(4-chlorophenyl)-2-oxo-2-phenylethyl benzoate (**3ka**)<sup>2</sup>

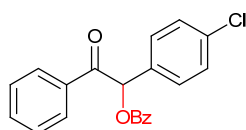

Flash column chromatography on silica gel (ethyl acetate/petroleum ether 1:40) gave **3ka** (46.9 mg, 67% yield) as a yellow solid.  $^1\text{H}$  NMR ( $\text{CDCl}_3$ , 400 MHz):  $\delta$  8.12 (d,  $J = 7.2$  Hz, 2H), 7.99 (d,  $J = 7.4$  Hz, 2H), 7.60-7.51 (m, 4H), 7.47-7.42 (m, 4H), 7.37 (d,  $J = 8.5$  Hz, 2H), 7.08 (s, 1H).  $^{13}\text{C}$  NMR ( $\text{CDCl}_3$ , 100 MHz):  $\delta$  193.4, 165.9, 135.4, 134.5, 133.7, 133.5, 132.3, 129.9, 129.4, 129.1, 128.8, 128.7, 128.4, 99.9, 77.0.

### 1-(naphthalen-2-yl)-2-oxo-2-phenylethyl benzoate (**3la**)



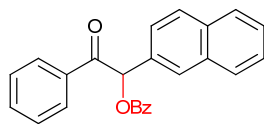

Flash column chromatography on silica gel (ethyl acetate/petroleum ether 1:40) gave **31a** (38.8 mg, 53% yield) as a white solid. Mp. 171-173 °C. <sup>1</sup>H NMR (CDCl<sub>3</sub>, 400 MHz): δ 8.16 (d, *J* = 7.2 Hz, 2H), 8.06 (d, *J* = 7.2 Hz, 3H), 7.91-7.83 (m, 3H), 7.69 (d, *J* = 8.5 Hz, 1H), 7.60-7.56 (m, 1H), 7.53-7.50 (m, 3H), 7.47-7.40 (m, 4H), 7.28 (s, 1H). <sup>13</sup>C NMR (CDCl<sub>3</sub>, 100 MHz): δ 193.6, 166.0, 134.7, 133.5, 133.4, 133.2, 131.1, 130.0, 129.4, 129.1, 128.9, 128.9, 128.7, 128.6, 128.4, 128.2, 127.7, 126.9, 126.6, 125.6, 78.1. HRMS (ESI) *m/z* calcd for C<sub>25</sub>H<sub>18</sub>NaO<sub>3</sub> (M+Na)<sup>+</sup> 389.1148, found 389.1150. IR (KBr) ν 3057, 2923, 2849, 1705, 1686, 1596, 1450, 1317, 1287, 1273, 1252, 1115 cm<sup>-1</sup>.

### 2-oxo-1,2-diphenylethyl 2-methylbenzoate (**3ab**)

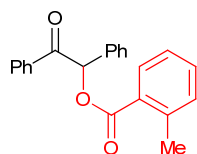

Flash column chromatography on silica gel (ethyl acetate/petroleum ether 1:40) gave **3ab** (59.4 mg, 90% yield) as a white solid. Mp. 104-105 °C. <sup>1</sup>H NMR (CDCl<sub>3</sub>, 400 MHz): δ 8.07 (d, *J* = 7.2 Hz, 1H), 8.00 (d, *J* = 7.3 Hz, 2H), 7.56 (d, *J* = 6.6 Hz, 2H), 7.52-7.48 (m, 1H), 7.42-7.31 (m, 6H), 7.25-7.21 (m, 2H), 7.09 (s, 1H), 2.61 (s, 3H). <sup>13</sup>C NMR (CDCl<sub>3</sub>, 100 MHz): δ 193.8, 166.9, 140.6, 134.7, 133.7, 133.4, 132.3, 131.6, 131.0, 129.2, 129.1, 128.8, 128.7, 128.7, 128.6, 125.7, 77.9, 21.7. IR (KBr) ν 3065, 3028, 2969, 2927, 1719, 1683, 1597, 1448, 1296, 1251, 1225, 1129, 1094 cm<sup>-1</sup>.

### 2-oxo-1,2-diphenylethyl 4-methylbenzoate (**3ac**)<sup>3</sup>

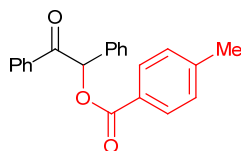

Flash column chromatography on silica gel (ethyl acetate/petroleum ether 1:40) gave **3ac** (40.3 mg, 61% yield) as a yellow solid. <sup>1</sup>H NMR (CDCl<sub>3</sub>, 400 MHz): δ 8.02-7.99 (m, 4H), 7.57 (d, *J* = 6.6 Hz, 2H), 7.53-7.49 (m, 1H), 7.42-7.33 (m, 5H), 7.23 (d, *J* = 8.1 Hz, 2H), 7.08 (s, 1H), 2.39 (s, 3H). <sup>13</sup>C NMR (CDCl<sub>3</sub>, 100 MHz): δ 193.8, 166.1,

144.1, 134.7, 133.8, 133.4, 130.0, 129.2, 129.1, 129.1, 128.8, 128.6, 128.6, 126.6, 77.7, 21.7.

### 2-oxo-1,2-diphenylethyl 3-methylbenzoate (**3ad**)

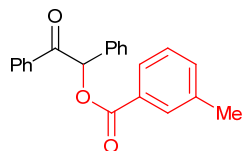

Flash column chromatography on silica gel (ethyl acetate/petroleum ether 1:40) gave **3ad** (57.4 mg, 87% yield) as a white solid. Mp. 119-121 °C. <sup>1</sup>H NMR (CDCl<sub>3</sub>, 400 MHz): δ 8.02 (d, *J* = 7.3 Hz, 2H), 7.94 (d, *J* = 5.4 Hz, 2H), 7.60 (d, *J* = 7.5 Hz, 2H), 7.55-7.51 (m, 1H), 7.44-7.31 (m, 7H), 7.12 (s, 1H), 2.39 (s, 3H). <sup>13</sup>C NMR (CDCl<sub>3</sub>, 100 MHz): δ 193.7, 166.2, 138.2, 134.7, 134.1, 133.8, 133.4, 130.4, 129.3, 129.1, 128.8, 128.8, 128.7, 128.6, 128.3, 127.1, 77.8, 21.2. IR (KBr) ν 3062, 3037, 2980, 2922, 1708, 1688, 1595, 1448, 1289, 1199, 1109.

### 2-oxo-1,2-diphenylethyl 4-methoxybenzoate (**3ae**)<sup>2</sup>

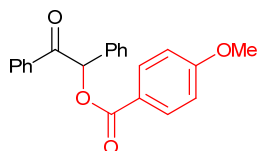

Flash column chromatography on silica gel (ethyl acetate/petroleum ether 1:20) gave **3ae** (59.5 mg, 86% yield) as a white solid. <sup>1</sup>H NMR (CDCl<sub>3</sub>, 400 MHz): δ 8.09 (d, *J* = 8.8 Hz, 2H), 8.02 (d, *J* = 7.4 Hz, 2H), 7.59 (d, *J* = 6.7 Hz, 2H), 7.54-7.50 (m, 1H), 7.43-7.34 (m, 5H), 7.09 (s, 1H), 6.92 (d, *J* = 8.9 Hz, 2H), 3.84 (s, 3H). <sup>13</sup>C NMR (CDCl<sub>3</sub>, 100 MHz): δ 193.9, 165.7, 163.7, 134.7, 133.9, 133.4, 132.0, 129.2, 129.0, 128.8, 128.6, 128.6, 121.7, 113.6, 77.6, 55.4.

### 2-oxo-1,2-diphenylethyl 4-fluorobenzoate (**3af**)<sup>4</sup>

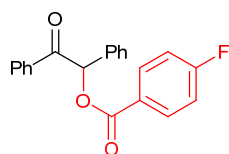

Flash column chromatography on silica gel (ethyl acetate/petroleum ether 1:40) gave **3af** (62.1 mg, 93% yield) as a yellow solid. <sup>1</sup>H NMR (CDCl<sub>3</sub>, 400 MHz): δ 8.17-8.13

(m, 2H), 8.01 (d,  $J = 7.3$  Hz, 2H), 7.59-7.51 (m, 3H), 7.44-7.35 (m, 5H), 7.14-7.09 (m, 3H).  $^{13}\text{C}$  NMR ( $\text{CDCl}_3$ , 100 MHz):  $\delta$  193.6, 166.1 (d,  $J_{\text{C-F}} = 252.9$  Hz), 134.7, 133.7, 133.6, 132.6 (d,  $J_{\text{C-F}} = 9.4$  Hz), 129.5, 129.2, 128.9, 128.8, 128.7, 125.7 (d,  $J_{\text{C-F}} = 2.9$  Hz), 115.8, 115.5, 78.1.

#### 2-oxo-1,2-diphenylethyl 4-chlorobenzoate (**3ag**)<sup>4</sup>

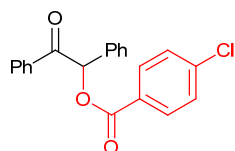

Flash column chromatography on silica gel (ethyl acetate/petroleum ether 1:40) gave **3ag** (59.5 mg, 85% yield) as a yellow solid.  $^1\text{H}$  NMR ( $\text{CDCl}_3$ , 400 MHz):  $\delta$  8.07 (d,  $J = 8.6$  Hz, 2H), 8.01 (d,  $J = 7.3$  Hz, 2H), 7.59-7.51 (m, 3H), 7.44-7.36 (m, 7H), 7.11 (s, 1H).  $^{13}\text{C}$  NMR ( $\text{CDCl}_3$ , 100 MHz):  $\delta$  193.5, 165.2, 139.9, 134.6, 133.6, 133.6, 131.4, 129.5, 129.3, 128.9, 128.8, 128.8, 128.8, 127.9, 78.2.

#### 2-oxo-1,2-diphenylethyl 3-chlorobenzoate (**3ah**)<sup>5</sup>

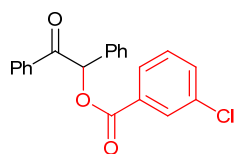

Flash column chromatography on silica gel (ethyl acetate/petroleum ether 1:40) gave **3ah** (53.2 mg, 76% yield) as a yellow solid.  $^1\text{H}$  NMR ( $\text{CDCl}_3$ , 400 MHz):  $\delta$  8.10 (s, 1H), 8.00 (d,  $J = 8.0$  Hz, 3H), 7.59-7.51 (m, 4H), 7.44-7.36 (m, 6H), 7.11 (s, 1H).  $^{13}\text{C}$  NMR ( $\text{CDCl}_3$ , 100 MHz):  $\delta$  193.2, 164.8, 134.5, 134.5, 133.6, 133.4, 133.3, 131.1, 129.9, 129.7, 129.5, 129.2, 128.8, 128.7, 128.7, 128.1, 78.3.

#### 2-oxo-1,2-diphenylethyl 4-bromobenzoate (**3ai**)<sup>6</sup>

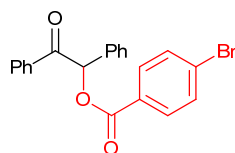

Flash column chromatography on silica gel (ethyl acetate/petroleum ether 1:40) gave **3ai** (67.8 mg, 86% yield) as a yellow solid.  $^1\text{H}$  NMR ( $\text{CDCl}_3$ , 400 MHz):  $\delta$  8.02-7.98 (m, 4H), 7.58 (d,  $J = 8.7$  Hz, 4H), 7.54-7.51 (m, 1H), 7.44-7.35 (m, 5H), 7.11 (s, 1H).  $^{13}\text{C}$  NMR ( $\text{CDCl}_3$ , 100 MHz):  $\delta$  193.5, 165.4, 134.6, 133.7, 133.6, 131.8, 131.5, 129.5,

129.3, 128.9, 128.8, 128.8, 128.6, 128.4, 78.2.

### 2-oxo-1,2-diphenylethyl 4-(trifluoromethyl)benzoate (**3aj**)<sup>4</sup>

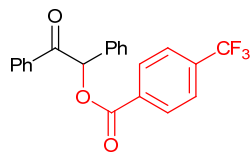

Flash column chromatography on silica gel (ethyl acetate/petroleum ether 1:40) gave **3aj** (27.6 mg, 36% yield) as a white solid. <sup>1</sup>H NMR (CDCl<sub>3</sub>, 400 MHz): δ 8.24 (d, *J* = 8.1 Hz, 2H), 7.99 (d, *J* = 7.3 Hz, 2H), 7.71 (d, *J* = 8.2 Hz, 2H), 7.59-7.52 (m, 3H), 7.45-7.37 (m, 5H), 7.12 (s, 1H). <sup>13</sup>C NMR (CDCl<sub>3</sub>, 100 MHz): δ 193.2, 164.8, 134.9, 134.5, 133.6, 133.4, 132.7, 130.4, 129.6, 129.3, 128.8, 128.8, 128.8, 128.7, 125.4 (q, *J*<sub>C-F</sub> = 3.6 Hz), 78.4.

### 2-oxo-1,2-diphenylethyl 2-naphthoate (**3ak**)

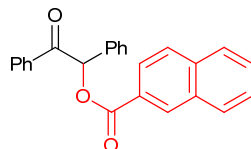

Flash column chromatography on silica gel (ethyl acetate/petroleum ether 1:40) gave **3ak** (50.5 mg, 69% yield) as a white solid. Mp. 119-120 °C. <sup>1</sup>H NMR (CDCl<sub>3</sub>, 400 MHz): δ 8.72 (s, 1H), 8.14 (d, *J* = 8.6 Hz, 1H), 8.05 (d, *J* = 7.3 Hz, 2H), 7.96 (d, *J* = 8.0 Hz, 1H), 7.90-7.87 (m, 2H), 7.66-7.52 (m, 5H), 7.46-7.38 (m, 5H), 7.20 (s, 1H). <sup>13</sup>C NMR (CDCl<sub>3</sub>, 100 MHz): δ 193.8, 166.3, 135.8, 134.8, 133.9, 133.6, 132.5, 131.7, 129.5, 129.4, 129.3, 128.9, 128.8, 128.8, 128.5, 128.3, 127.8, 126.7, 126.7, 125.4, 78.1. HRMS (ESI) *m/z* calcd for C<sub>25</sub>H<sub>18</sub>NaO<sub>3</sub> (M+Na)<sup>+</sup> 389.1148, found 389.1150. IR (KBr) ν 3056, 2924, 1695, 1597, 1449, 1367, 1356, 1288, 1255, 1229, 1193, 1130, 1084 cm<sup>-1</sup>.

### 2-oxo-1,2-diphenylethyl thiophene-2-carboxylate (**3al**)<sup>7</sup>

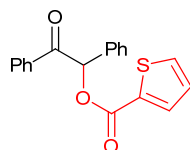

Flash column chromatography on silica gel (ethyl acetate/petroleum ether 1:40) gave **3al** (38.6 mg, 60% yield) as a white solid. <sup>1</sup>H NMR (CDCl<sub>3</sub>, 400 MHz): δ 8.00 (d, *J* =

7.4 Hz, 2H), 7.90 (d,  $J = 3.7$  Hz, 1H), 7.59-7.50 (m, 4H), 7.43-7.34 (m, 5H), 7.11-7.09 (m, 1H), 7.07 (s, 1H).  $^{13}\text{C}$  NMR ( $\text{CDCl}_3$ , 100 MHz):  $\delta$  193.5, 161.5, 134.5, 134.3, 133.5, 133.1, 132.7, 129.3, 129.1, 128.8, 128.8, 128.6, 128.6, 127.8, 78.0.

### 2-oxo-1,2-diphenylethyl decanoate (**3am**)

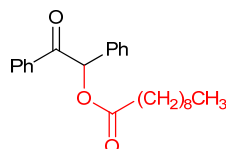

Flash column chromatography on silica gel (ethyl acetate/petroleum ether 1:40) gave **3am** (61.5 mg, 84% yield) as a pale-yellow oil.  $^1\text{H}$  NMR ( $\text{CDCl}_3$ , 400 MHz):  $\delta$  7.95 (d,  $J = 7.5$  Hz, 2H), 7.52-7.47 (m, 3H), 7.41-7.31 (m, 5H), 6.87 (s, 1H), 2.55-2.40 (m, 2H), 1.72-1.65 (m, 2H), 1.42-1.18 (m, 12H), 0.90-0.87 (m, 3H).  $^{13}\text{C}$  NMR ( $\text{CDCl}_3$ , 100 MHz):  $\delta$  193.9, 173.3, 134.7, 133.7, 133.4, 129.2, 129.0, 128.7, 128.6, 128.6, 77.3, 33.9, 31.8, 29.3, 29.2, 29.2, 29.0, 24.8, 22.6, 14.1. HRMS (ESI)  $m/z$  calcd for  $\text{C}_{24}\text{H}_{30}\text{NaO}_3$  ( $\text{M}+\text{Na}$ ) $^+$  389.2087, found 389.2089. IR (KBr)  $\nu$  3065, 3033, 2926, 2855, 1739, 1698, 1598, 1449, 1226, 1157, 1112  $\text{cm}^{-1}$ .

### 2-oxo-1,2-diphenylethyl stearate (**3an**)

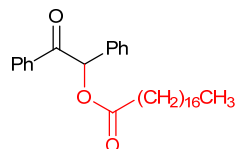

Flash column chromatography on silica gel (ethyl acetate/petroleum ether 1:40) gave **3an** (85.1 mg, 89% yield) as a white solid. mp 37-39  $^{\circ}\text{C}$ .  $^1\text{H}$  NMR ( $\text{CDCl}_3$ , 400 MHz):  $\delta$  7.94 (d,  $J = 7.2$  Hz, 2H), 7.53-7.46 (m, 3H), 7.42-7.31 (m, 5H), 6.86 (s, 1H), 2.54-2.39 (m, 2H), 1.71-1.61 (m, 2H), 1.39-1.15 (m, 28H), 0.90-0.87 (m, 3H).  $^{13}\text{C}$  NMR ( $\text{CDCl}_3$ , 100 MHz):  $\delta$  171.1, 156.7, 145.7, 138.0, 136.8, 136.3, 135.4, 134.8, 129.0, 129.0, 126.8, 125.7, 125.7, 123.8, 123.2, 123.0, 117.2, 116.8, 106.7, 92.8, 27.9, 27.9, 27.8, 23.2, 23.2, 23.2, 22.4, 21.1. HRMS (ESI)  $m/z$  calcd for  $\text{C}_{32}\text{H}_{46}\text{NaO}_3$  ( $\text{M}+\text{Na}$ ) $^+$  501.3339, found 501.3338. IR (KBr)  $\nu$  3056, 3031, 2925, 2853, 1741, 1699, 1598, 1449, 1226, 1160, 972, 757, 721, 696, 586, 528  $\text{cm}^{-1}$ .

## 5. References

- 1 Y.-J. Kim, N. Y. Kim and C.-H. Cheon, *Org. Lett.*, 2014, **16**, 3171.
- 2 M. B. Rubin and S. Inbar, *J. Org. Chem.*, 1988, **53**, 3355.
- 3 B. Li, Q. Gu, T. Zhao, Y. He and Y. Zhang, *Chin. J. Org. Chem.*, 2012, **32**, 1459.
- 4 J. E. Pickett, *Tetrahedron Lett.*, 2015, **56**, 3023.
- 5 J. K. Stille and D. D. Whitehurst, *J. Am. Chem. Soc.*, 1964, **86**, 4871.
- 6 D. R. Demuth and F. A. Luzzio, *PCT Int. Appl.* WO 201316206, 2013.
- 7 M. Sreenivasulu, K. A. Kumar, K. S. Reddy, K. S. Kumar, P. R. Kumar, K. B. Chandrasekhar, and M. Pal, *Tetrahedron Lett.* 2011, **52**, 727.

## 6. Copies of the $^1\text{H}$ NMR and $^{13}\text{C}$ NMR Spectra

### 2-oxo-1,2-diphenylethyl benzoate (3aa)

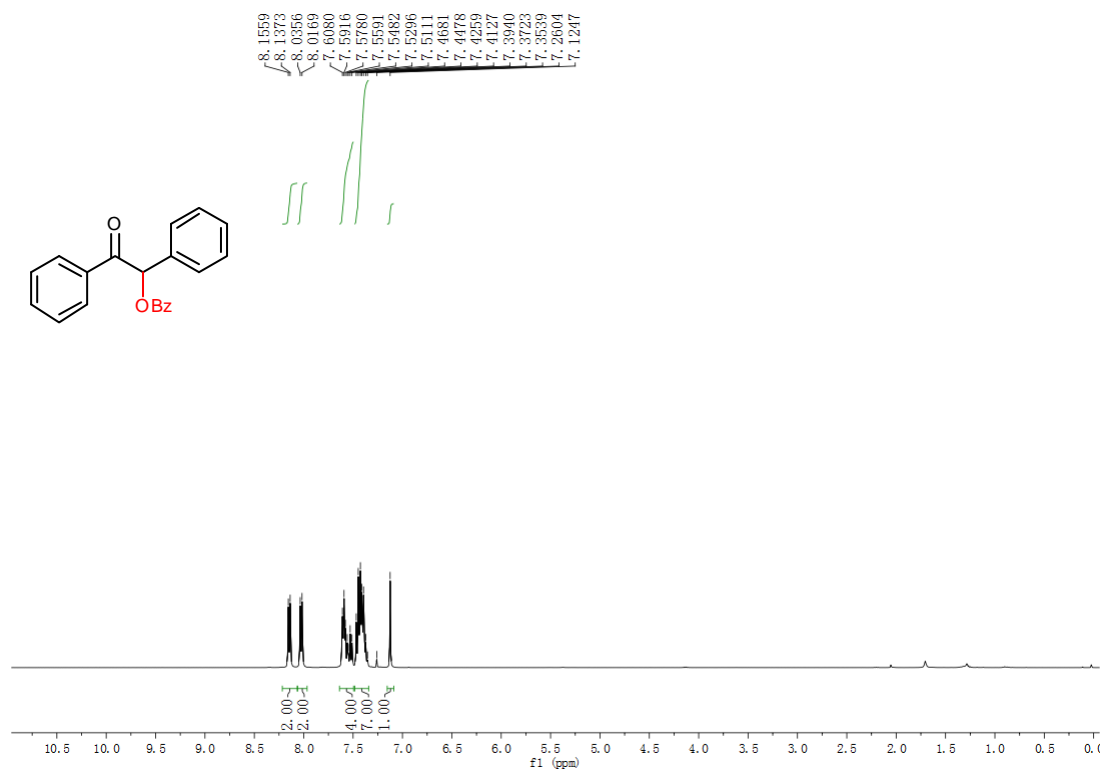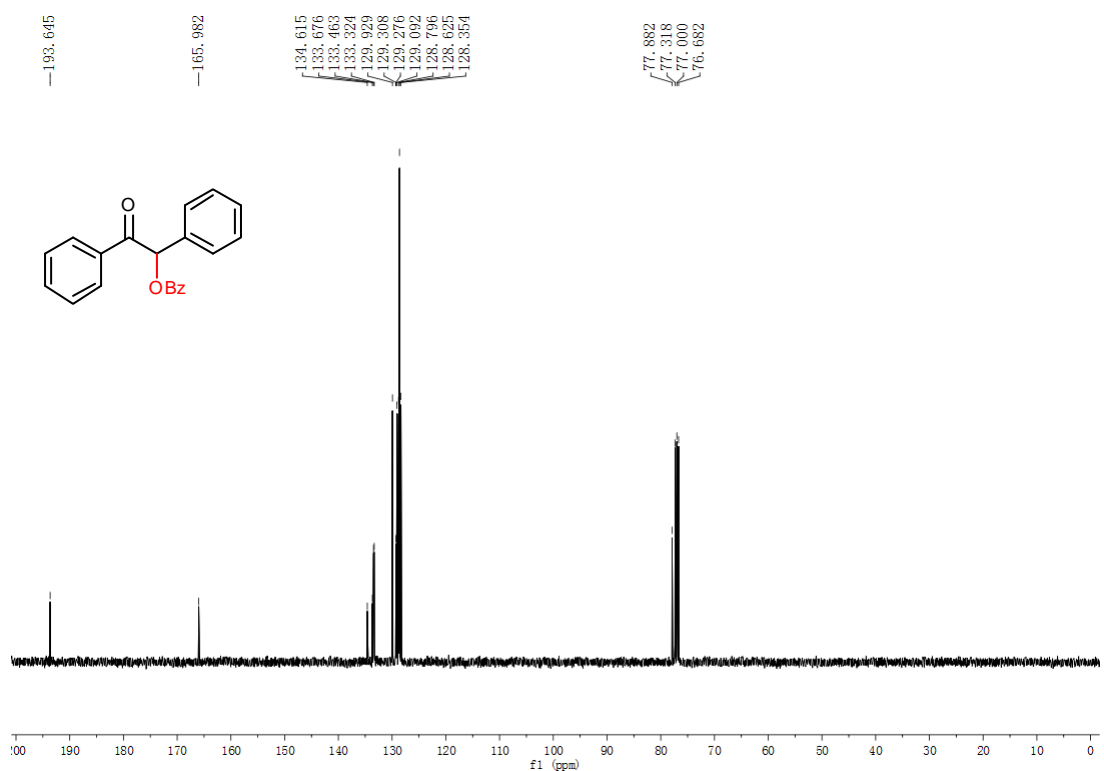

**2-(4-methoxyphenyl)-2-oxo-1-phenylethyl benzoate (3ba)**

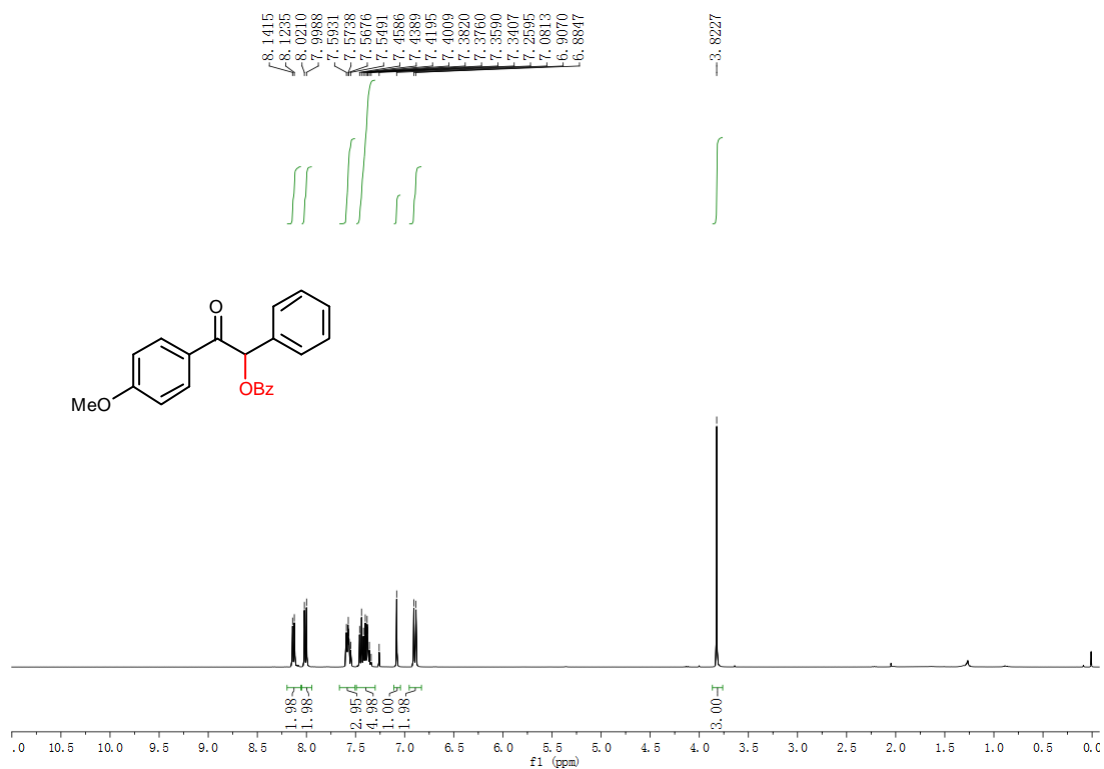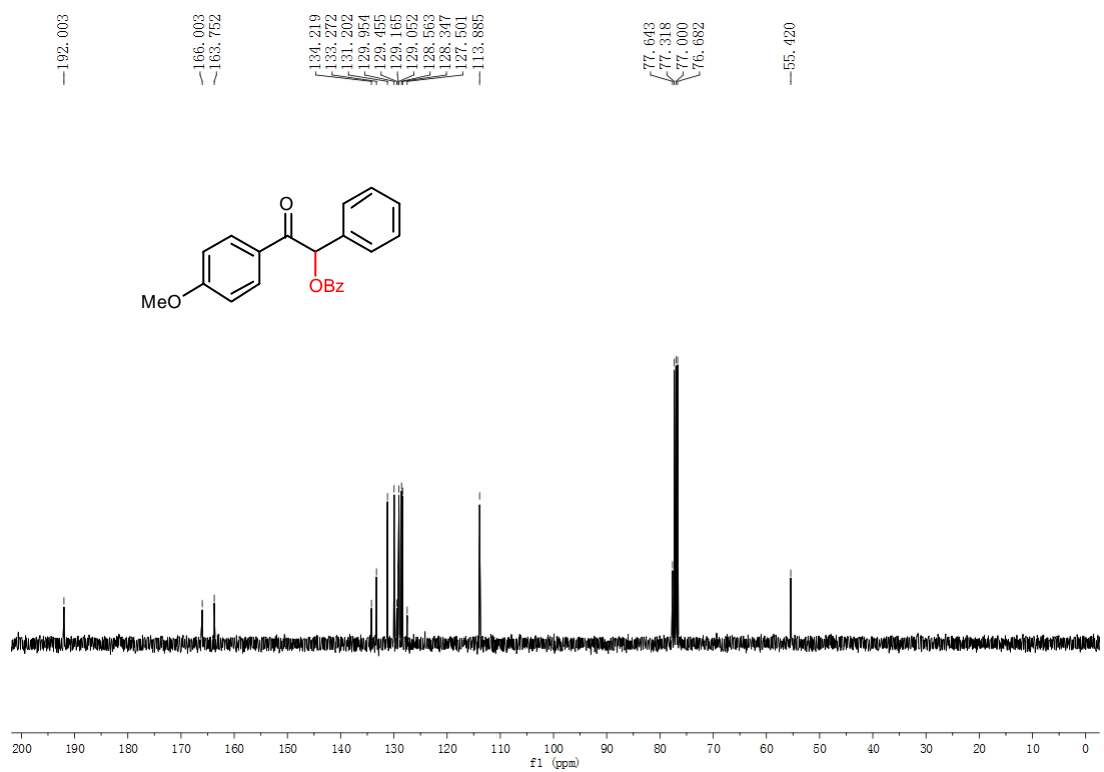



### 2-(4-chlorophenyl)-2-oxo-1-phenylethyl benzoate (3ca)

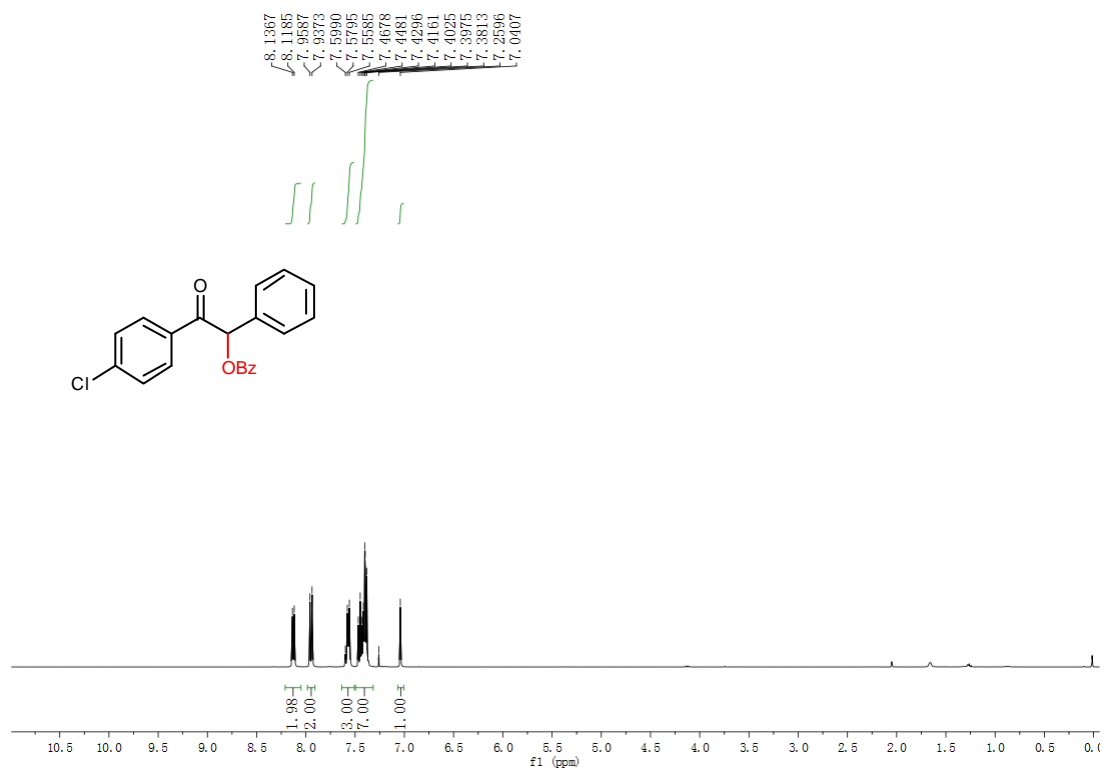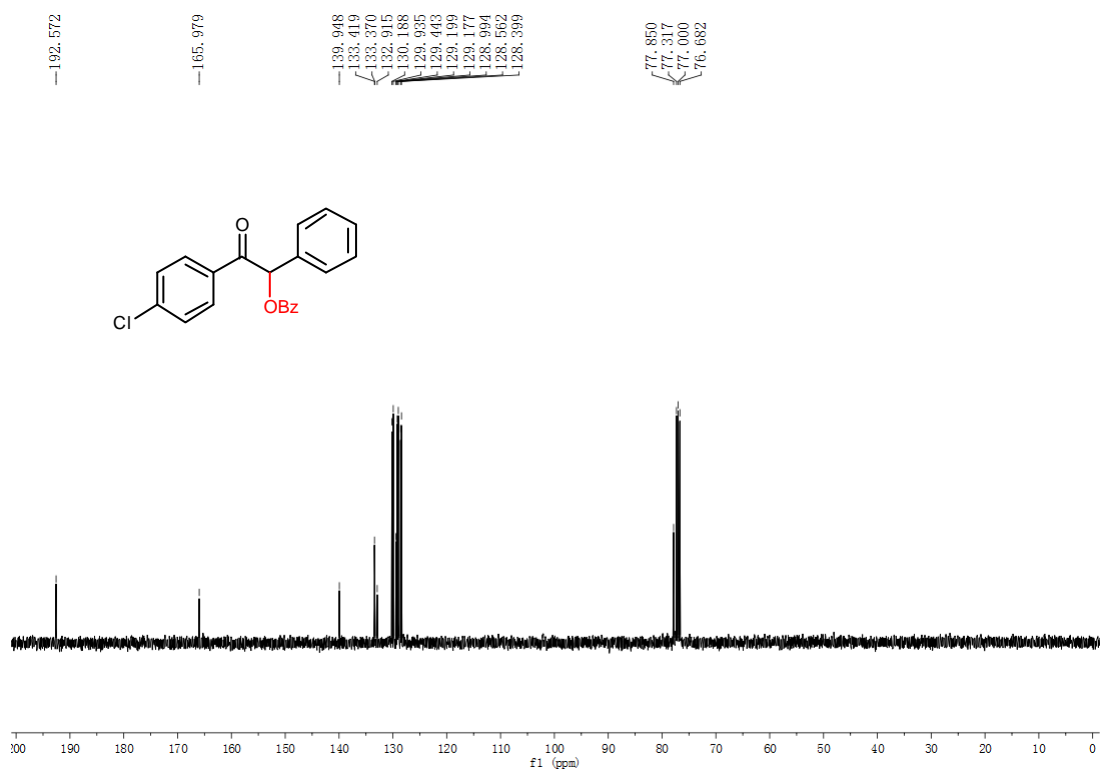

### 2-(4-fluorophenyl)-2-oxo-1-phenylethyl benzoate (3da)

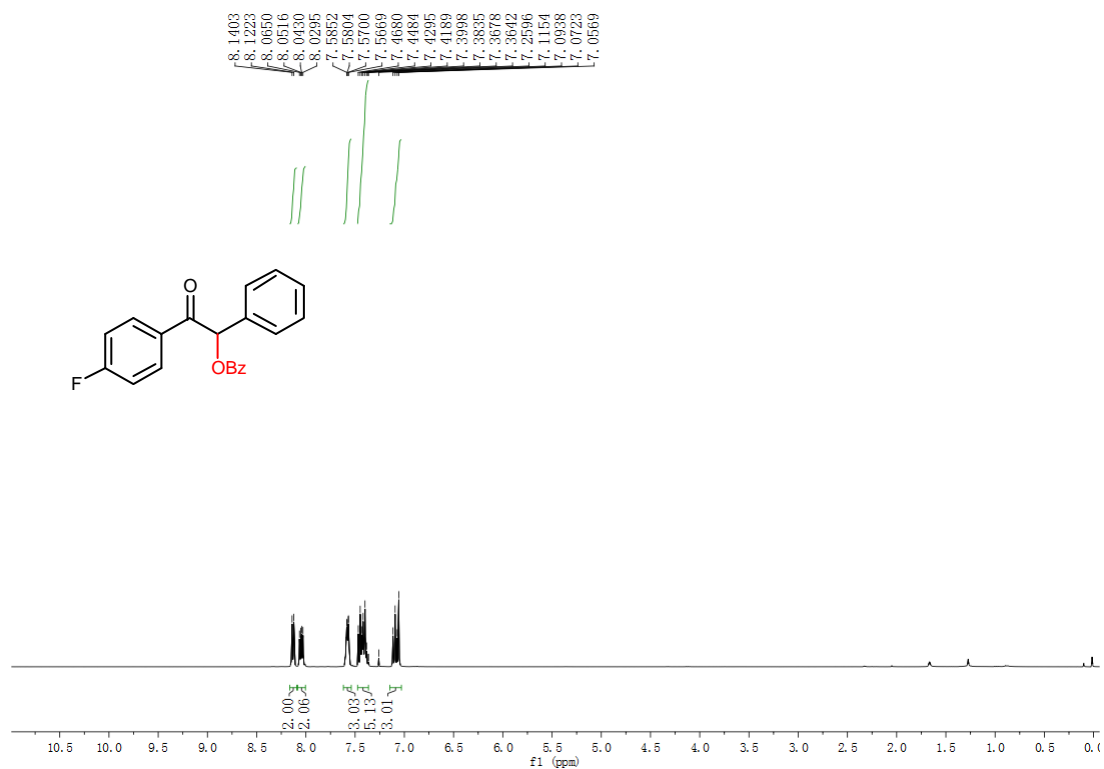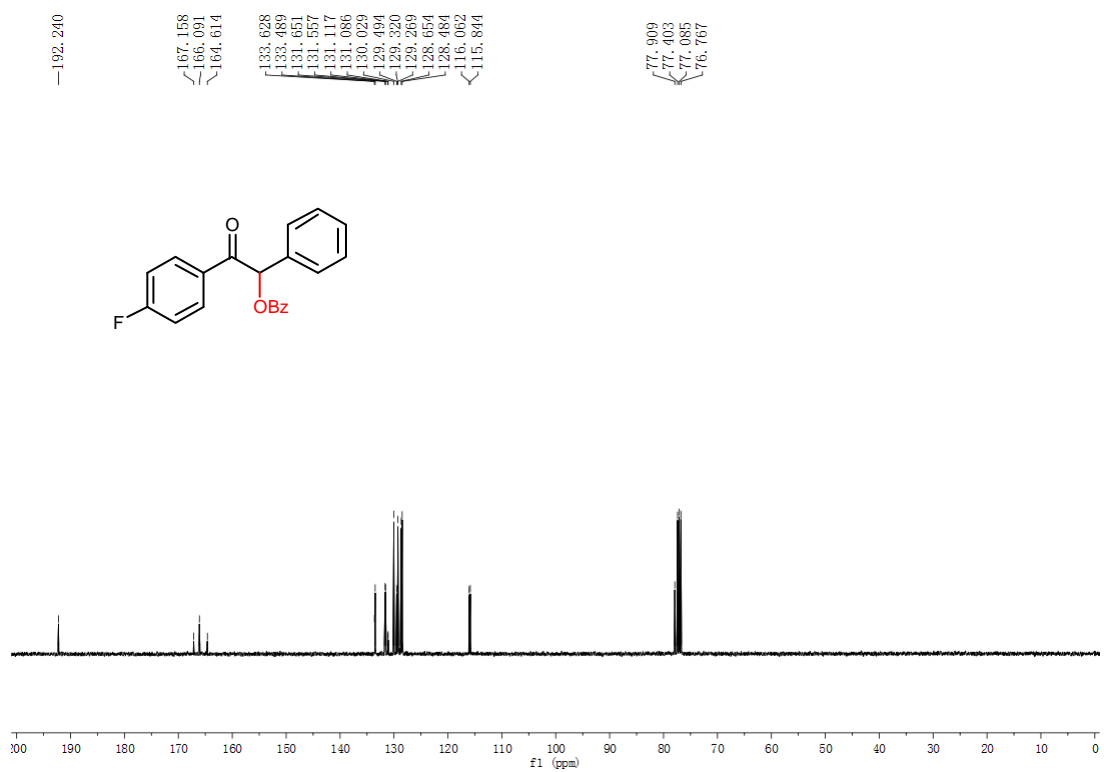

### 2-oxo-1-phenyl-2-(4-(trifluoromethyl)phenyl)ethyl benzoate (3ea)

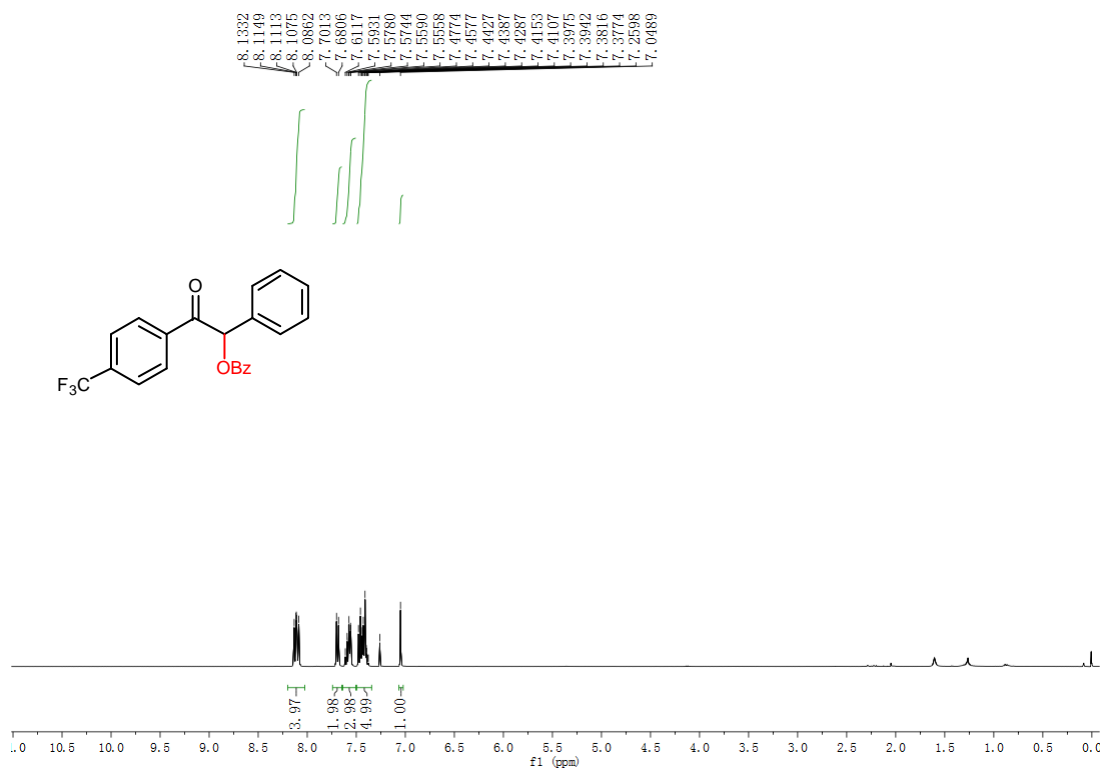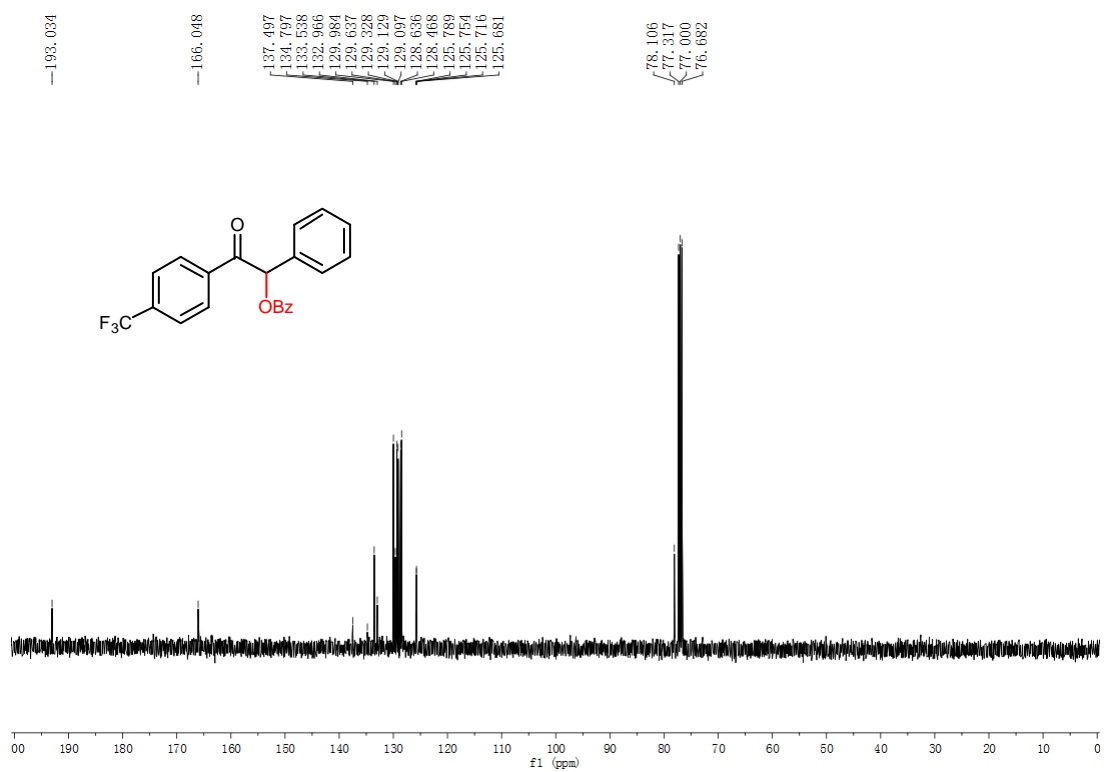

**2-(3-nitrophenyl)-2-oxo-1-phenylethyl benzoate (3fa)**

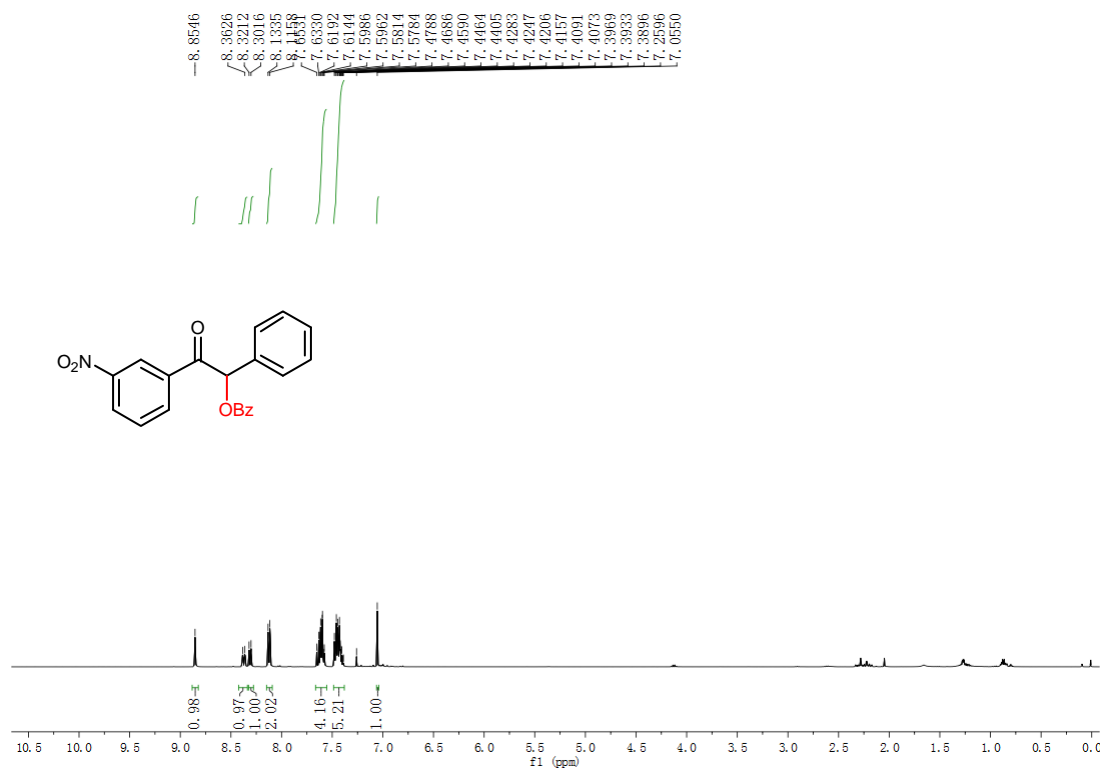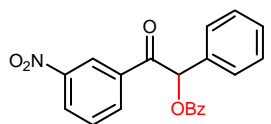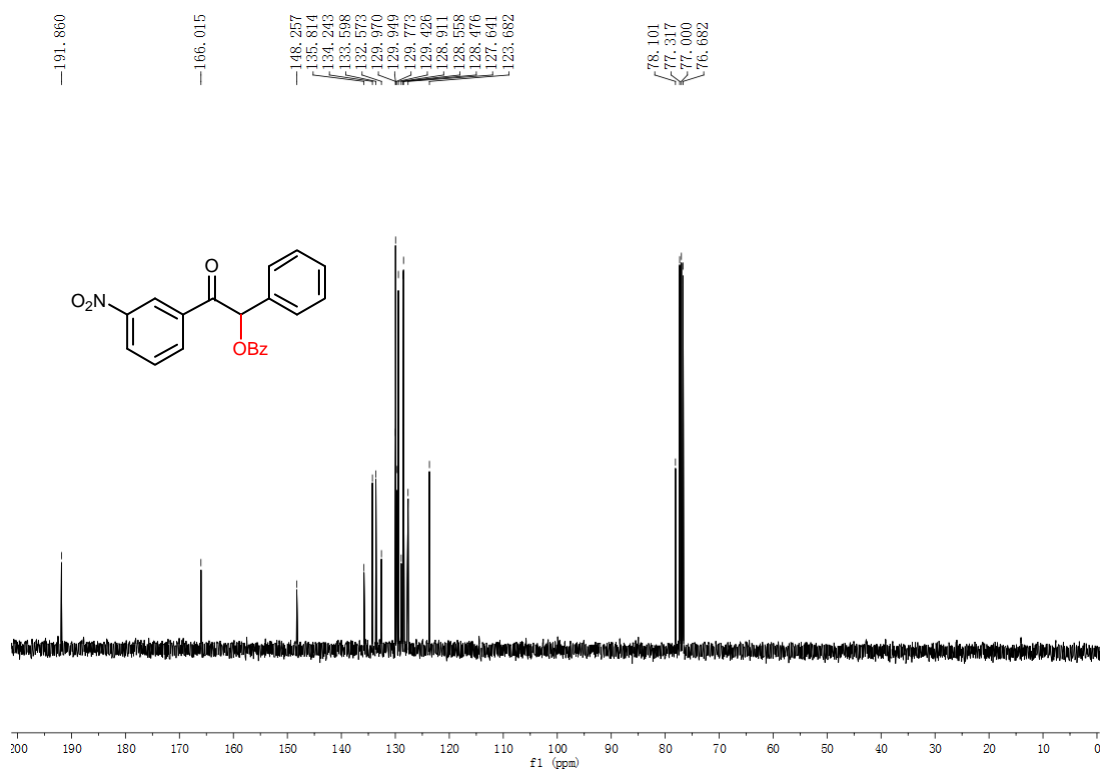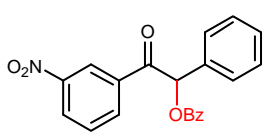

**2-oxo-1-phenyl-2-(o-tolyl)ethyl benzoate (3ga)**

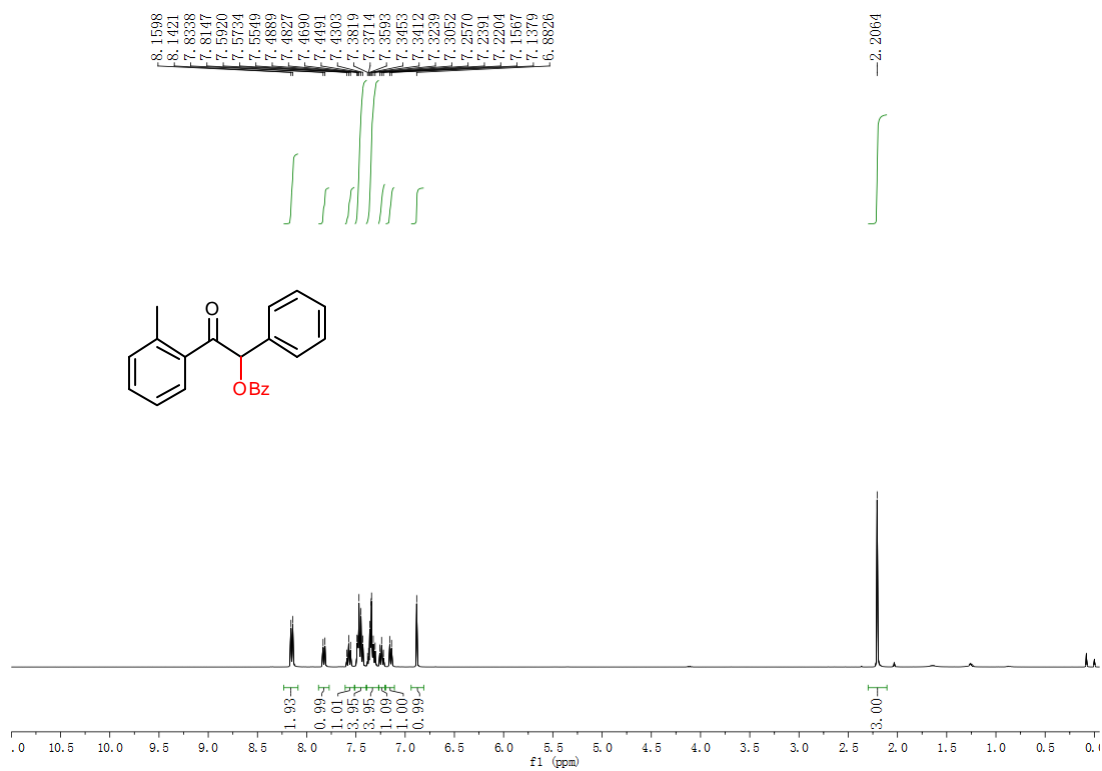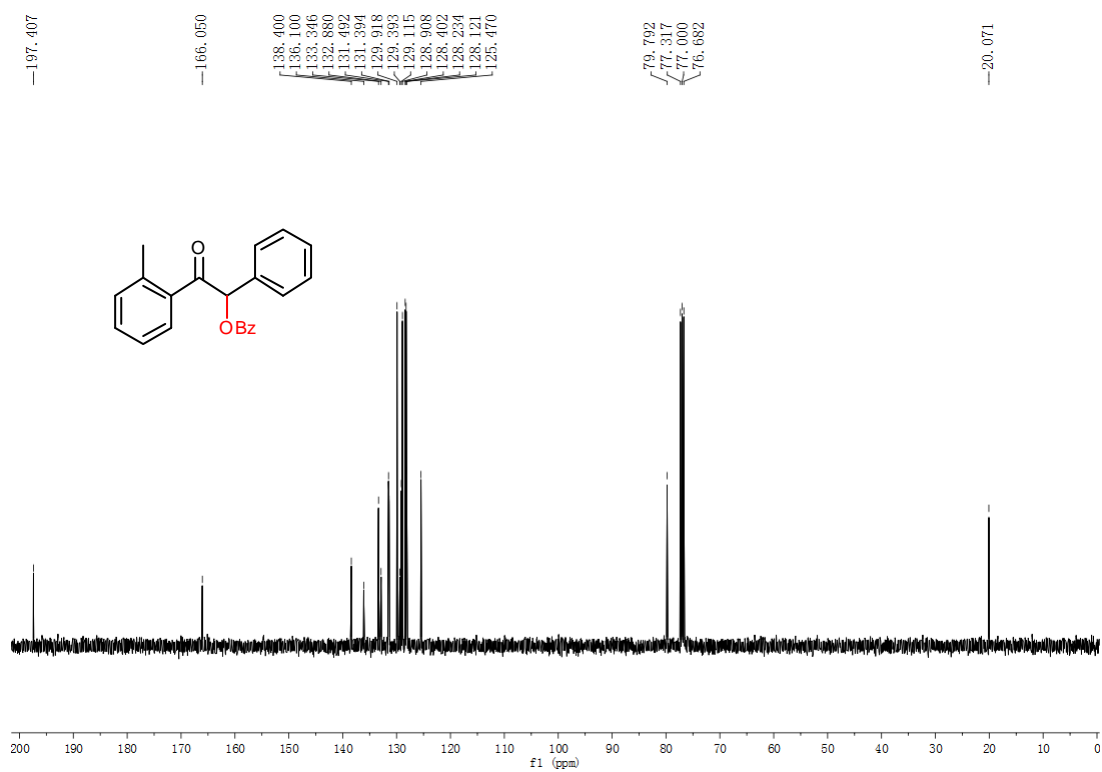

**2-oxo-1-phenyl-2-(m-tolyl)ethyl benzoate (3ha)**

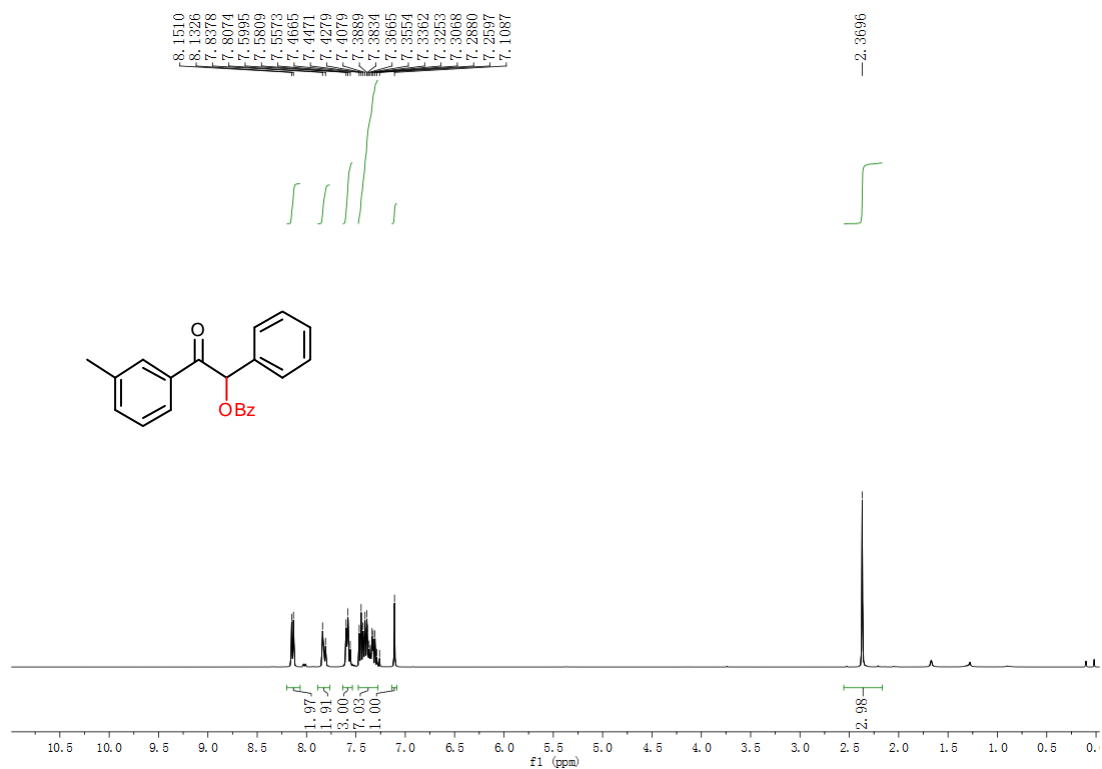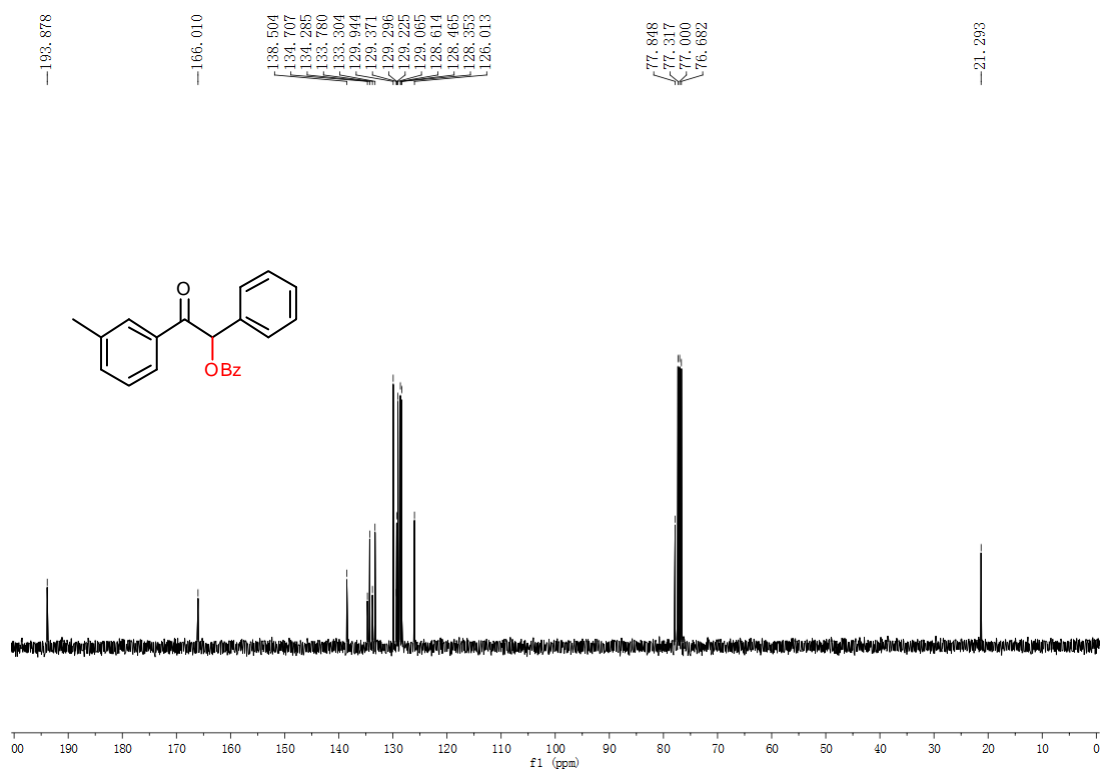

**2-(3,5-dimethylphenyl)-2-oxo-1-phenylethyl benzoate (3ia)**

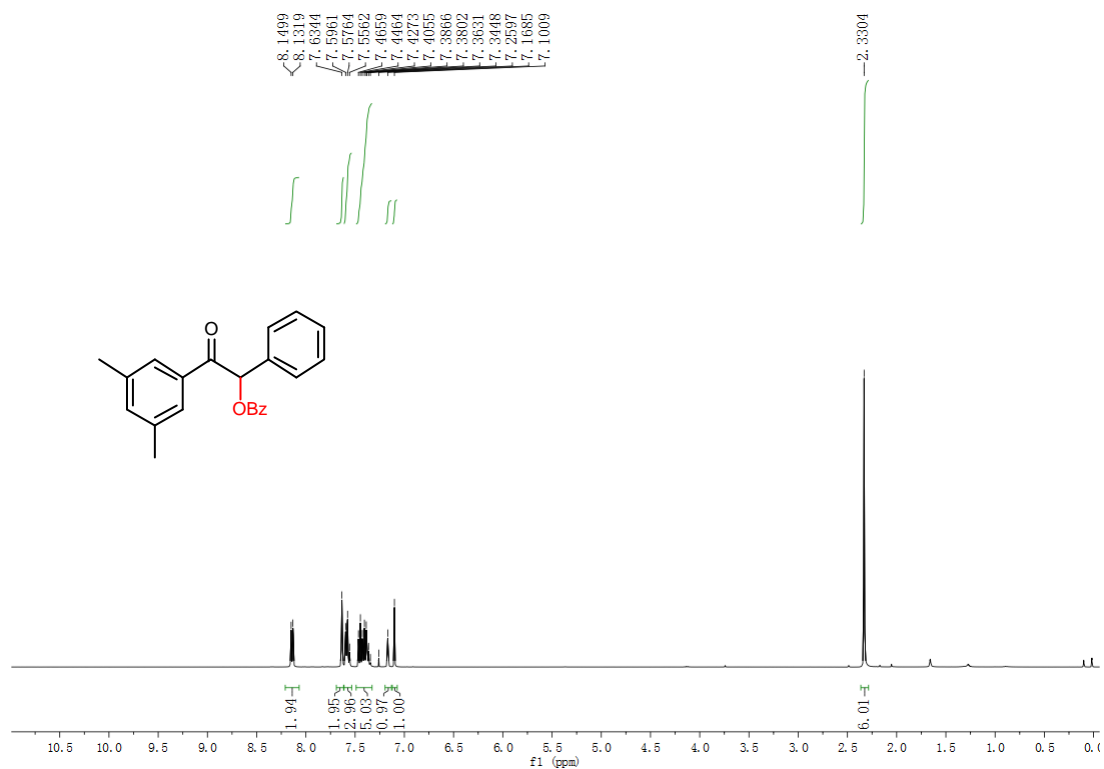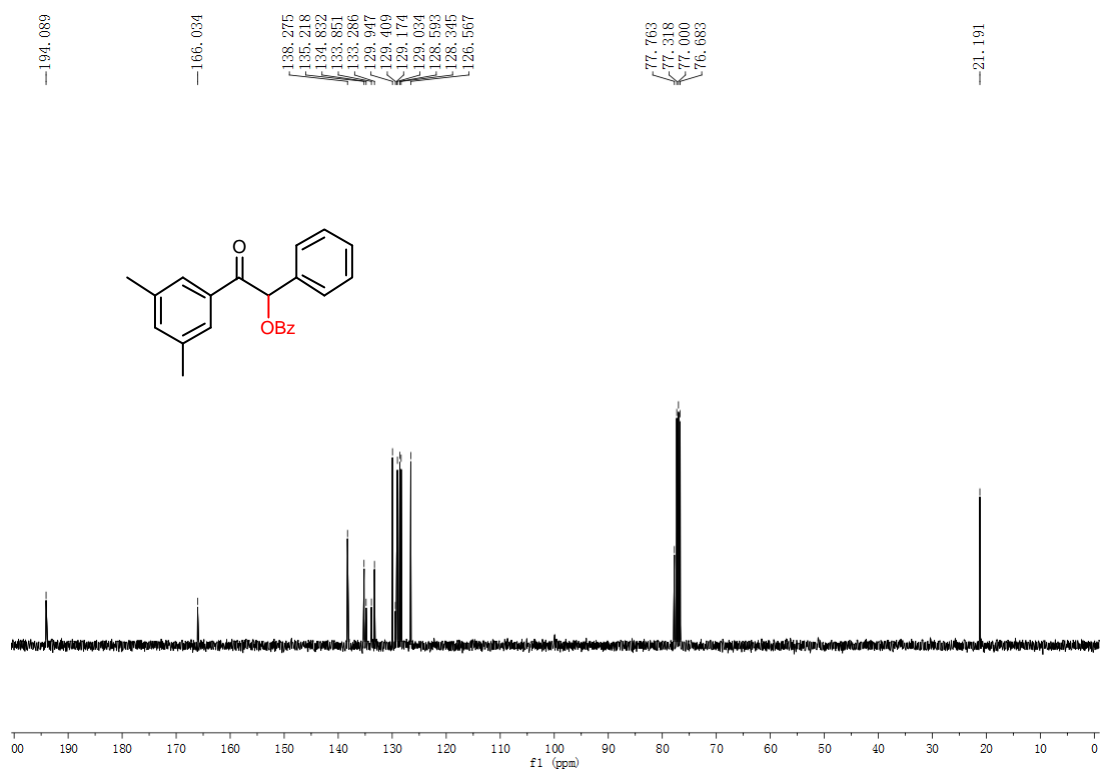

## 2-(naphthalen-1-yl)-2-oxo-1-phenylethyl benzoate (3ja)

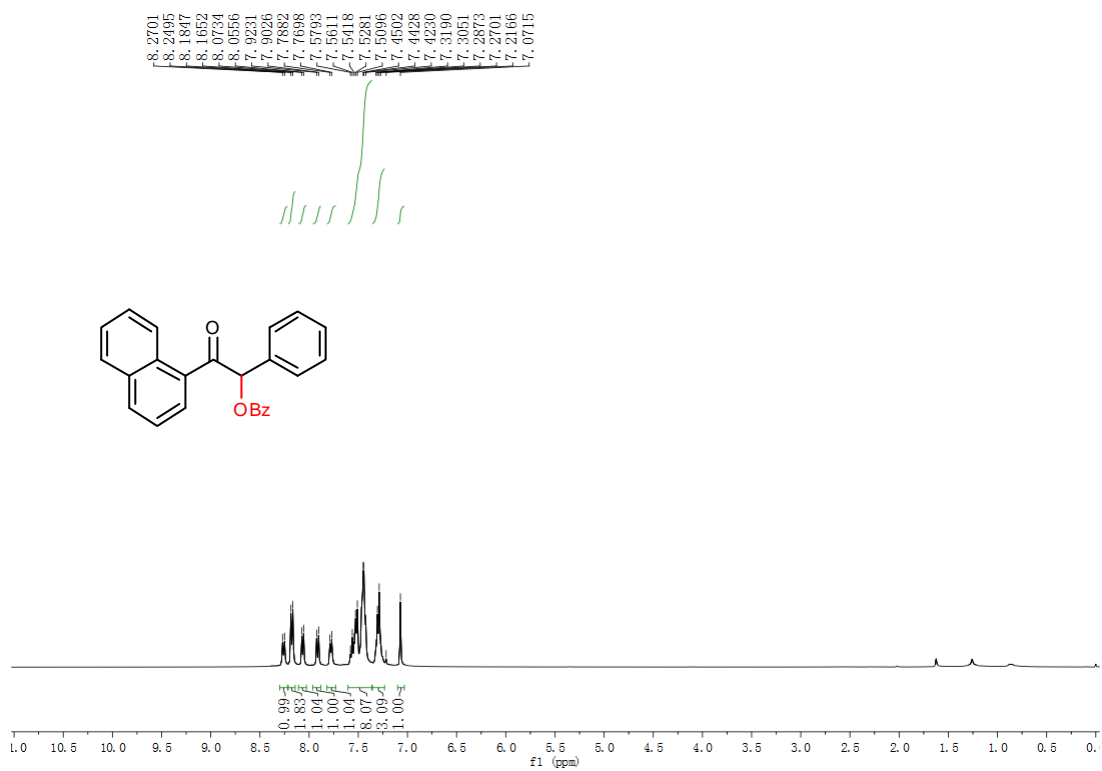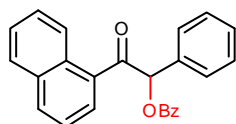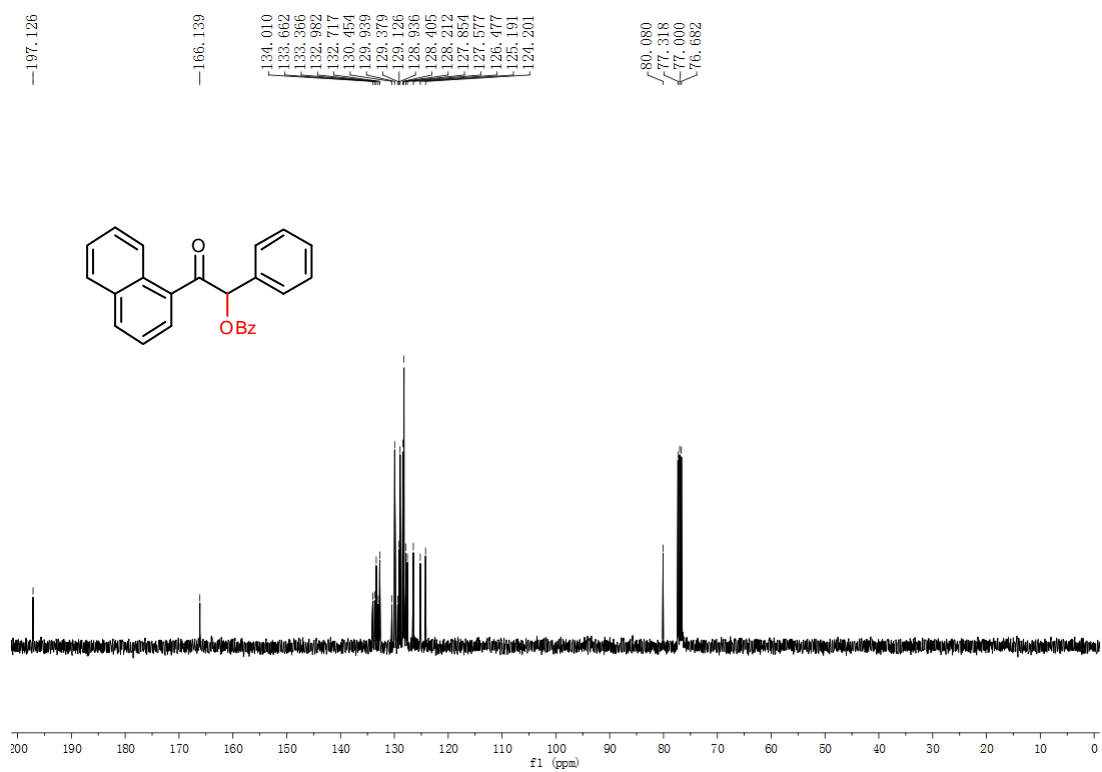



**1-(4-chlorophenyl)-2-oxo-2-phenylethyl benzoate (3ka)**

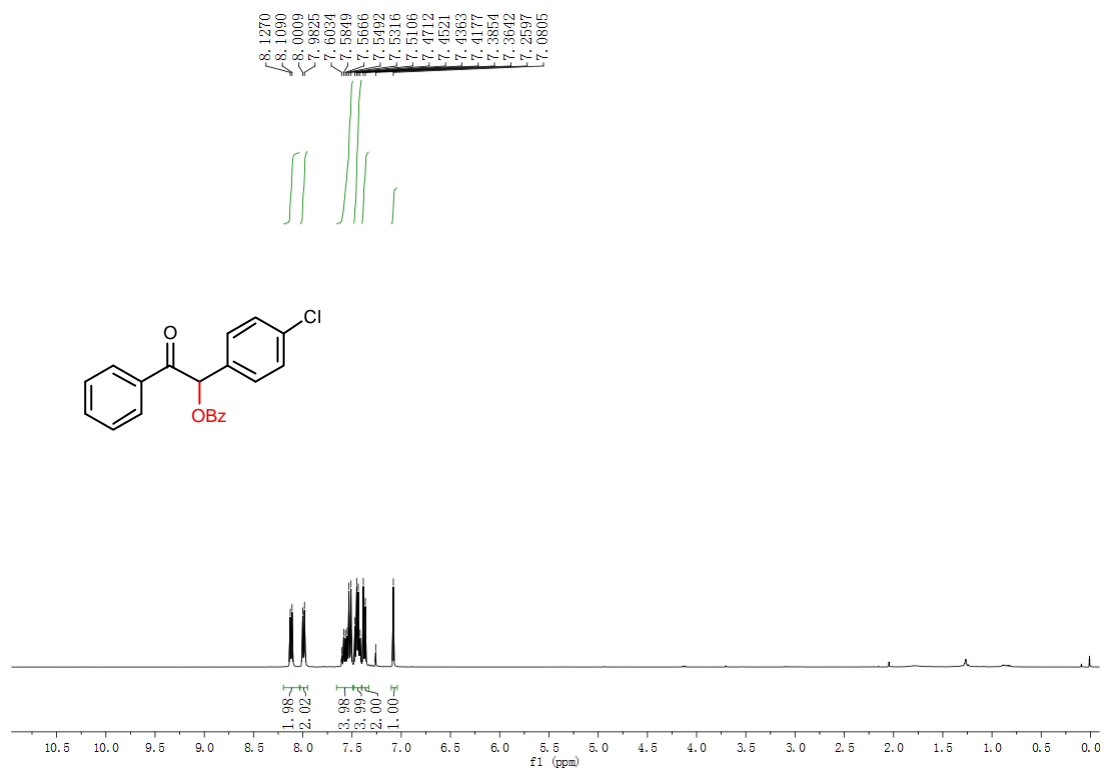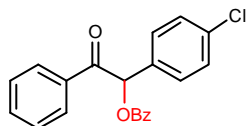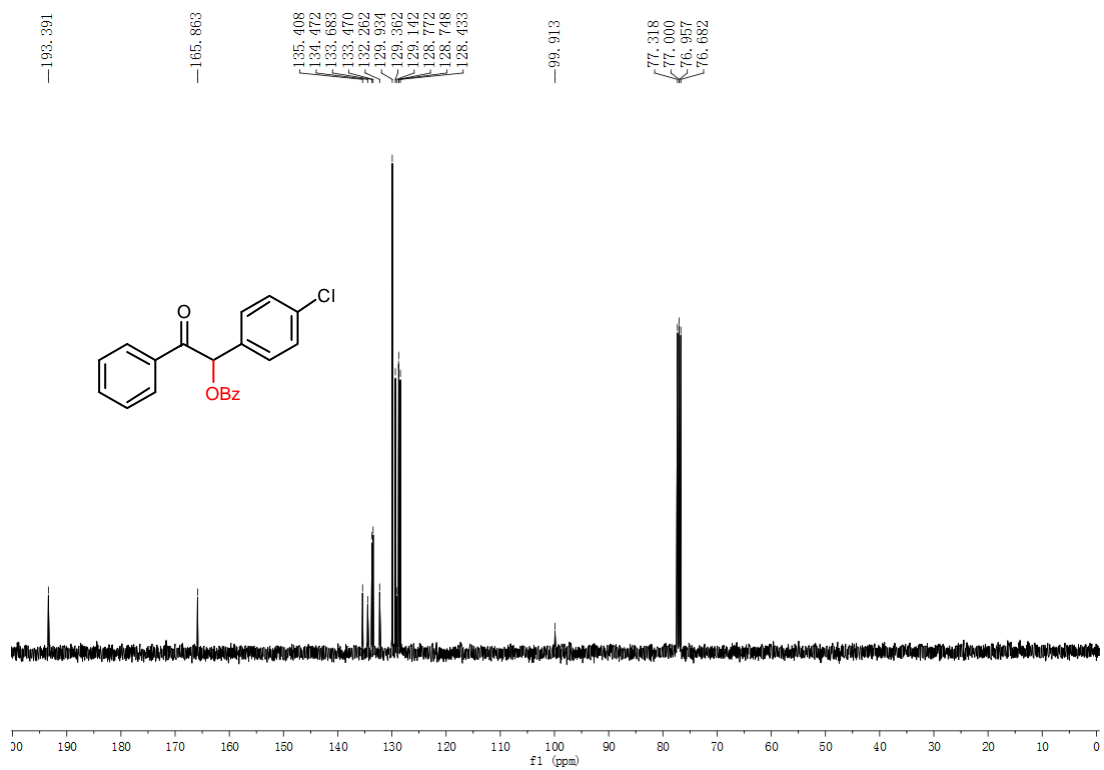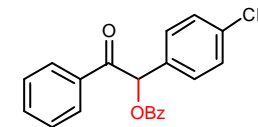

# 1-(naphthalen-2-yl)-2-oxo-2-phenylethyl benzoate (3la)

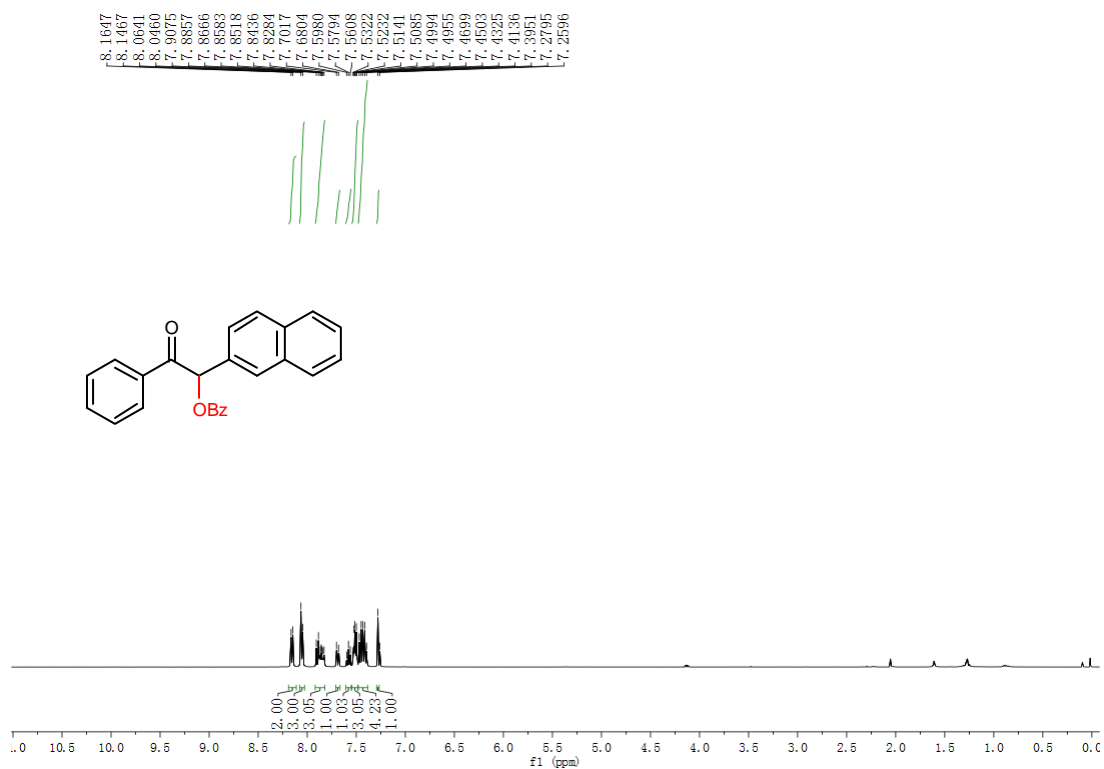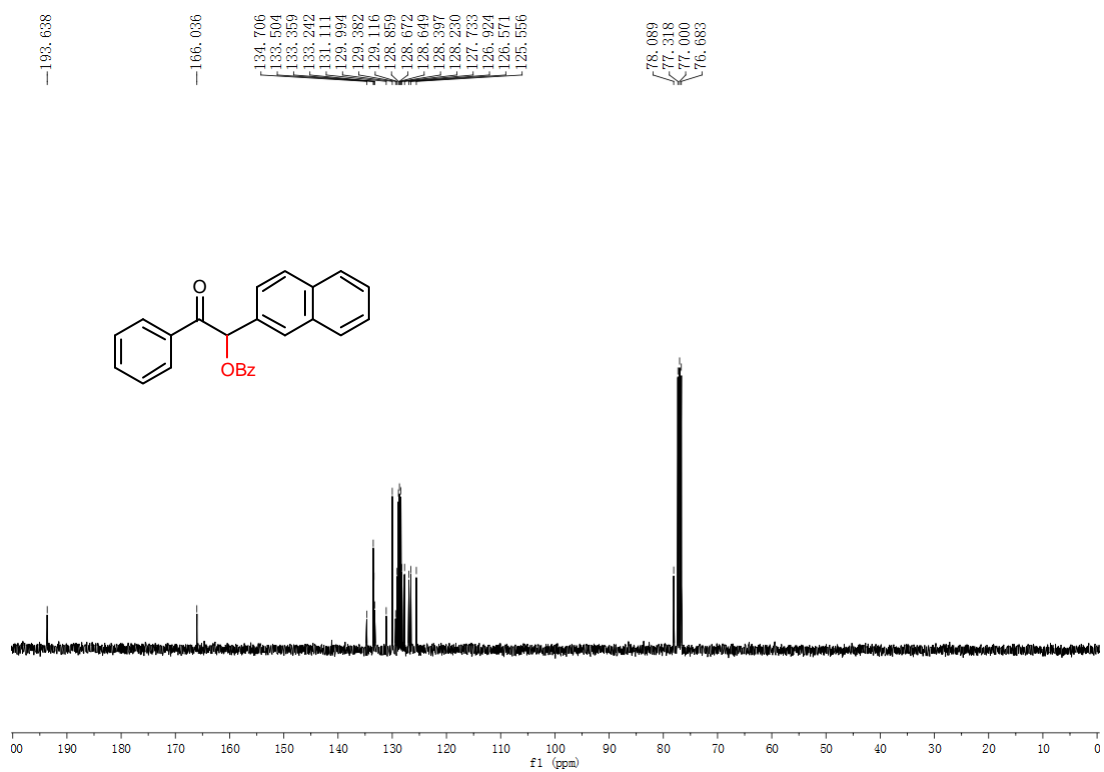

### 2-oxo-1,2-diphenylethyl 2-methylbenzoate (3ab)

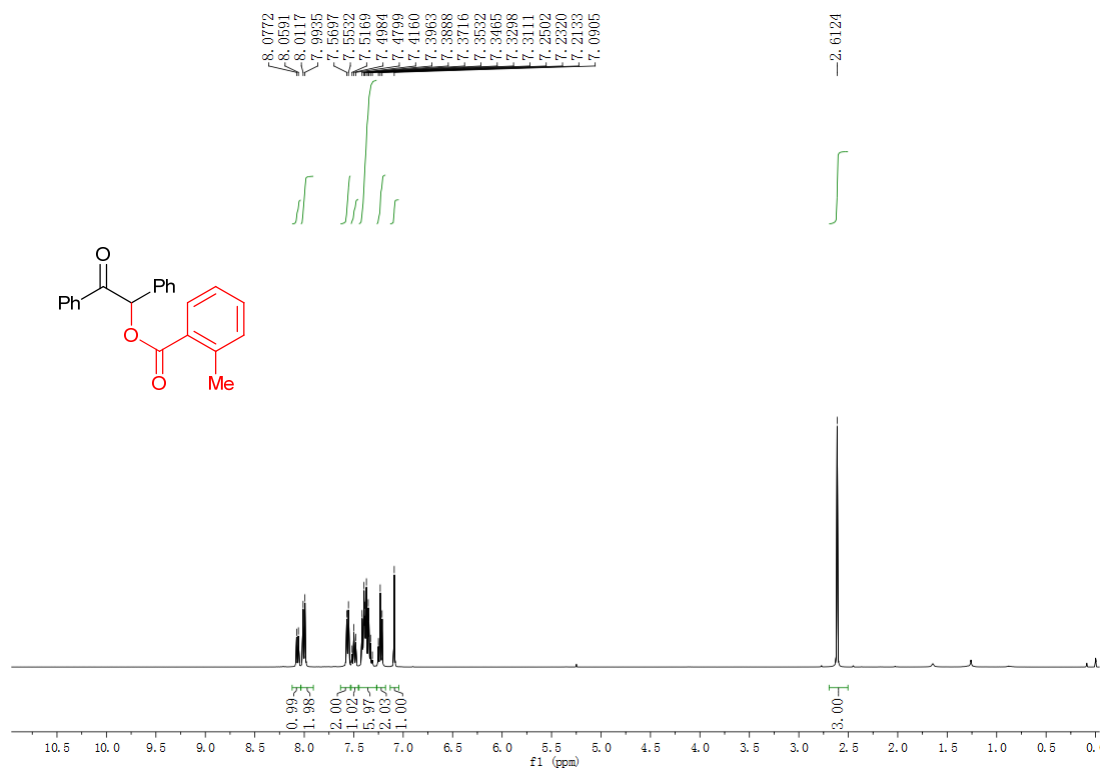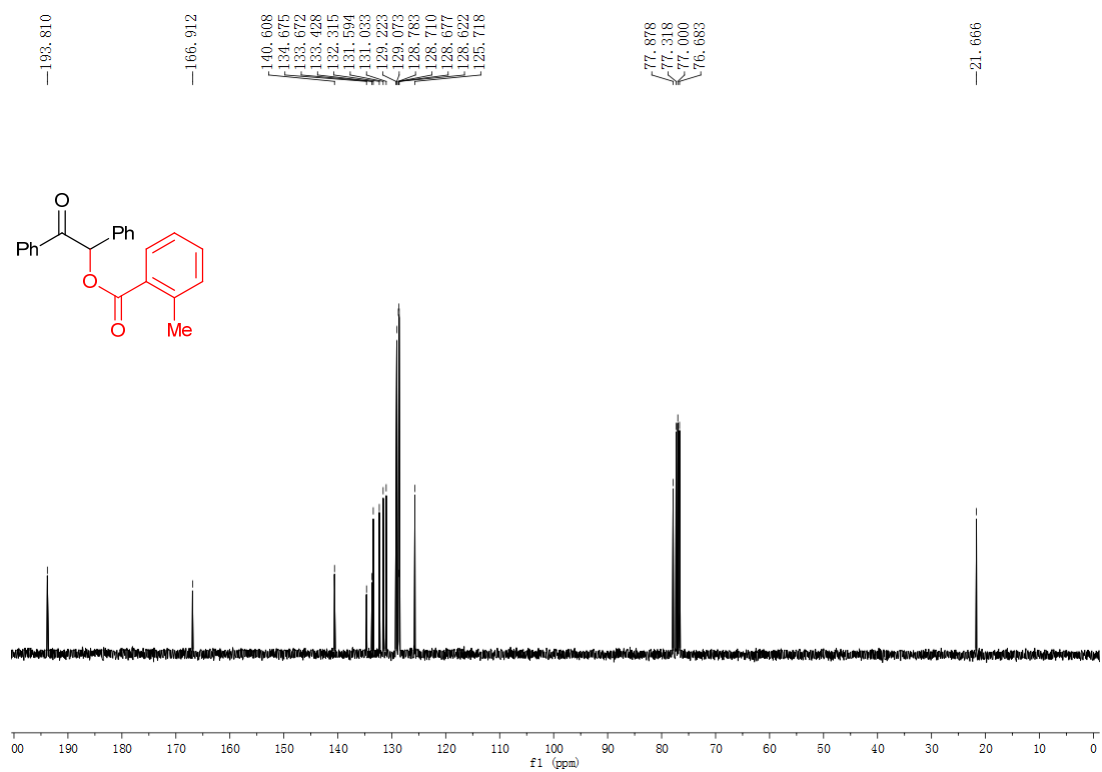

### 2-oxo-1,2-diphenylethyl 4-methylbenzoate (3ac)

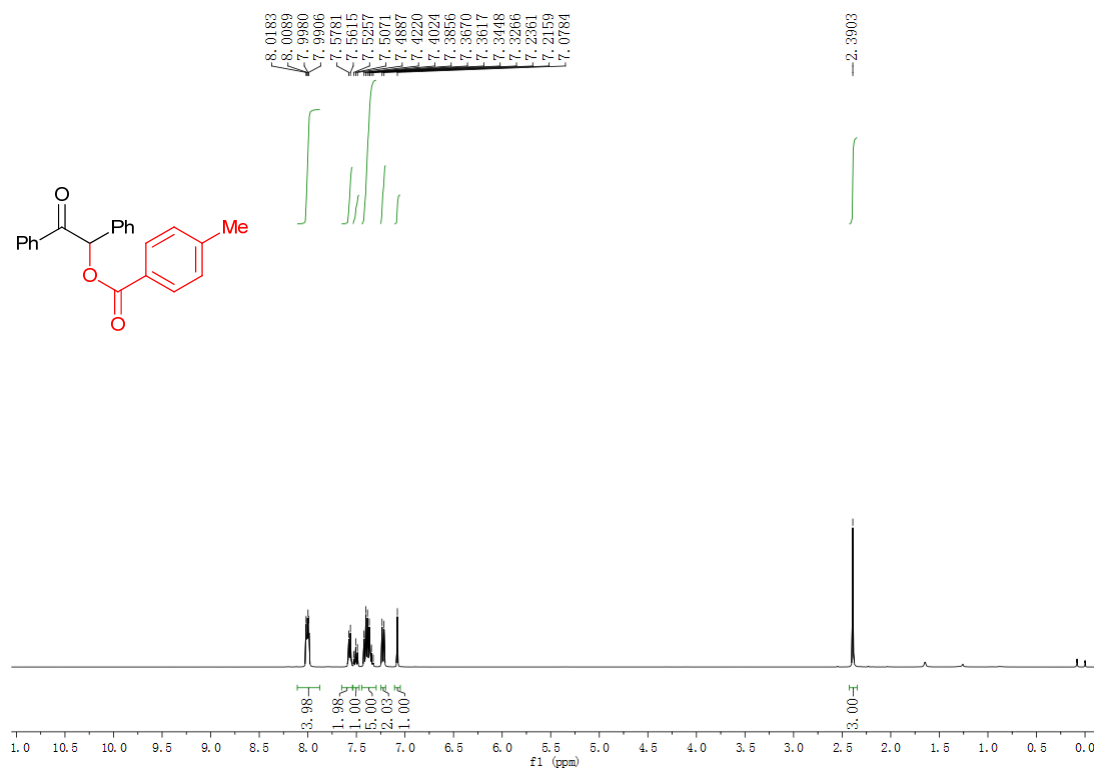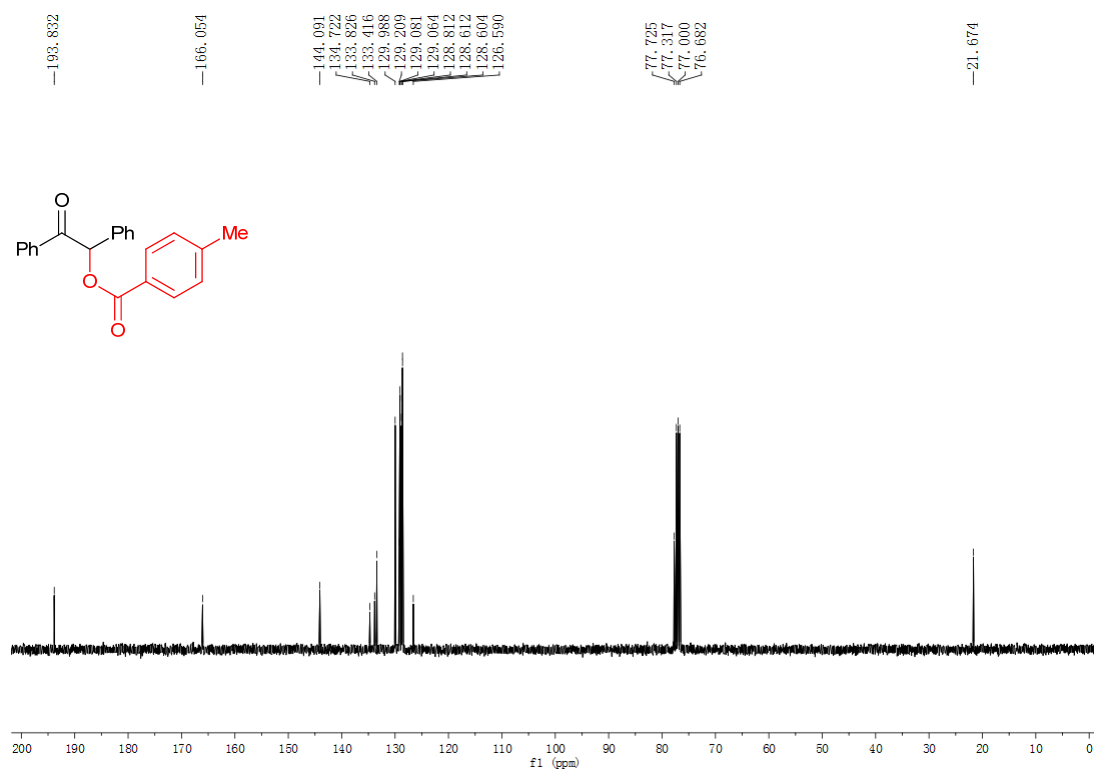

## 2-oxo-1,2-diphenylethyl 3-methylbenzoate (3ad)

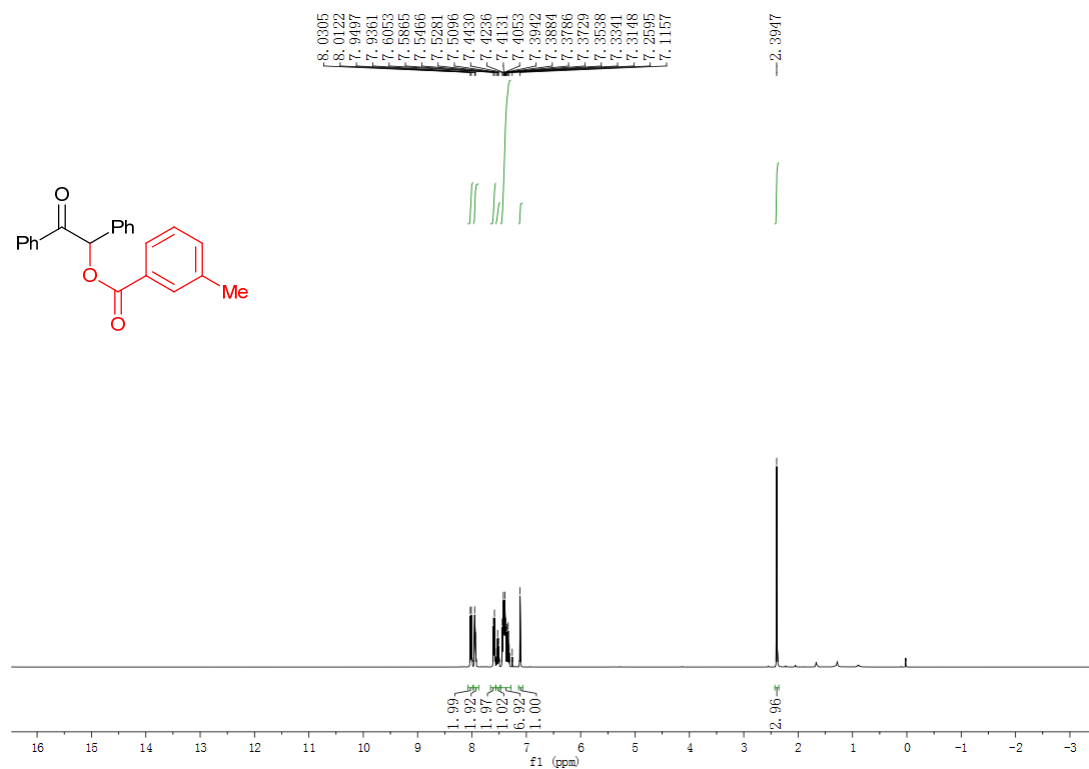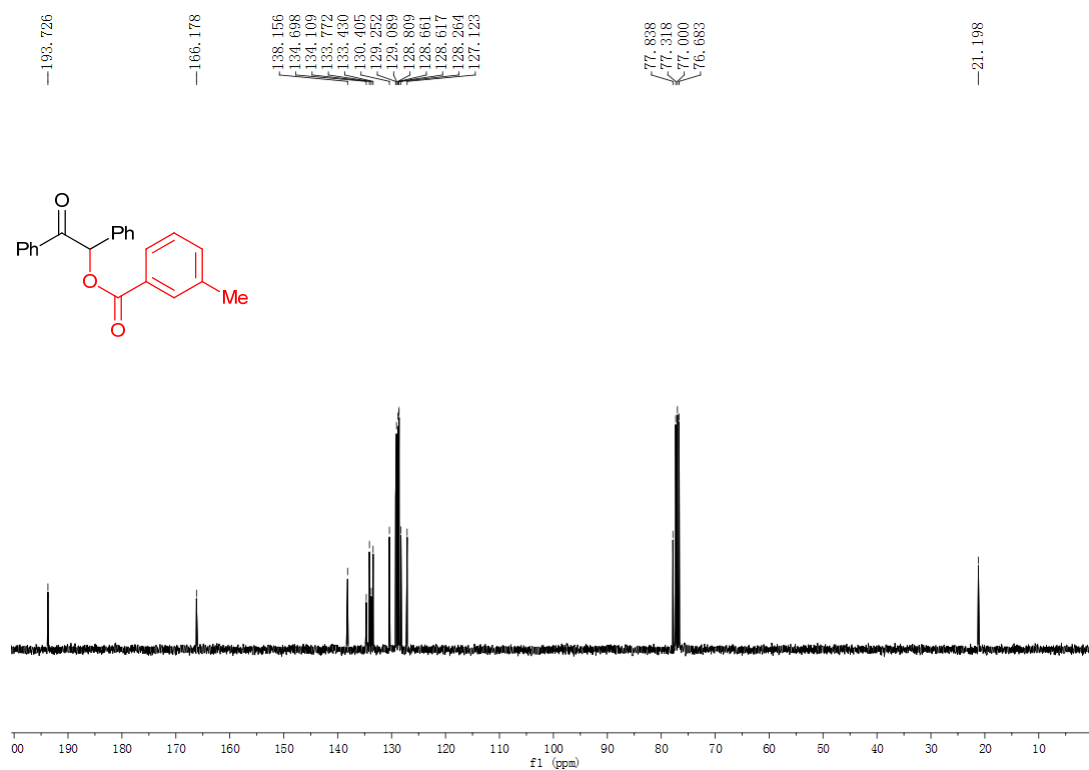

### 2-oxo-1,2-diphenylethyl 4-methoxybenzoate (3ae)

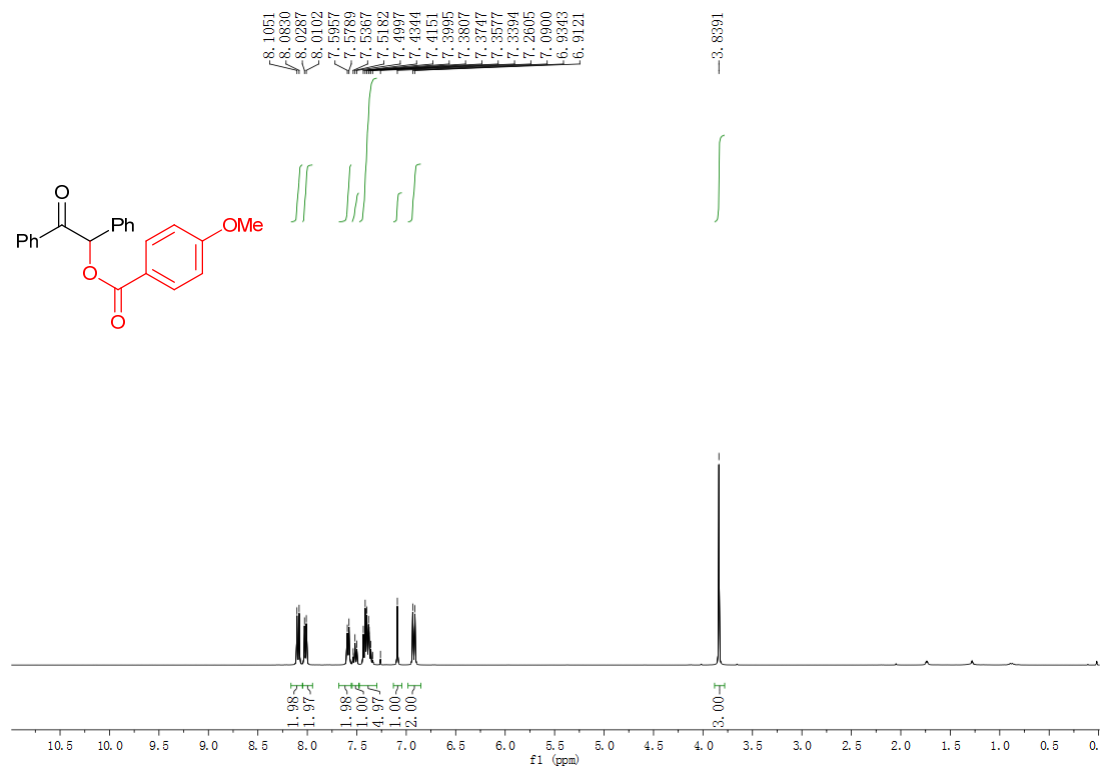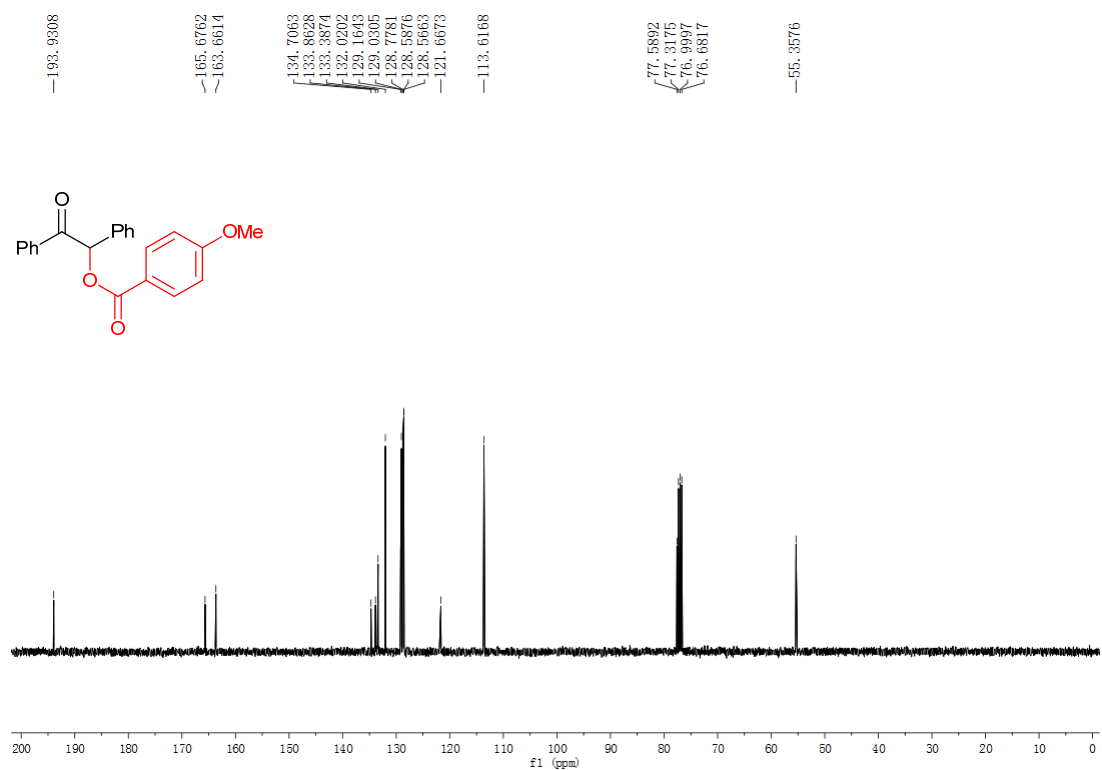

### 2-oxo-1,2-diphenylethyl 4-fluorobenzoate (3af)

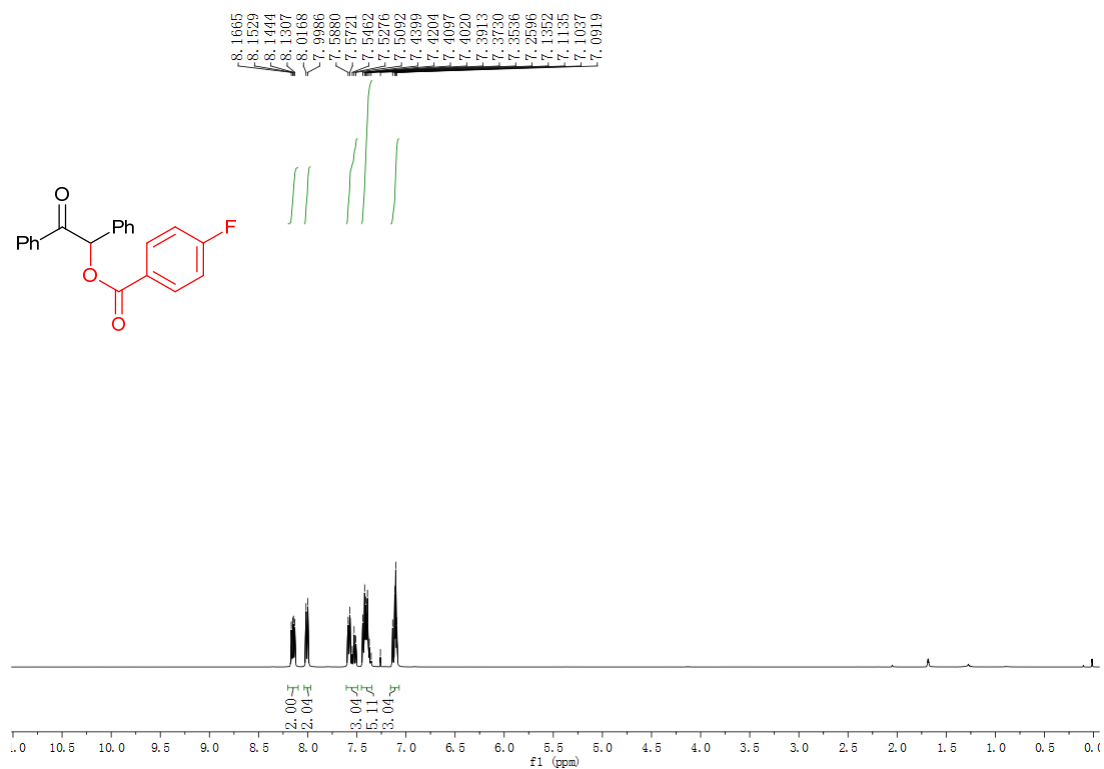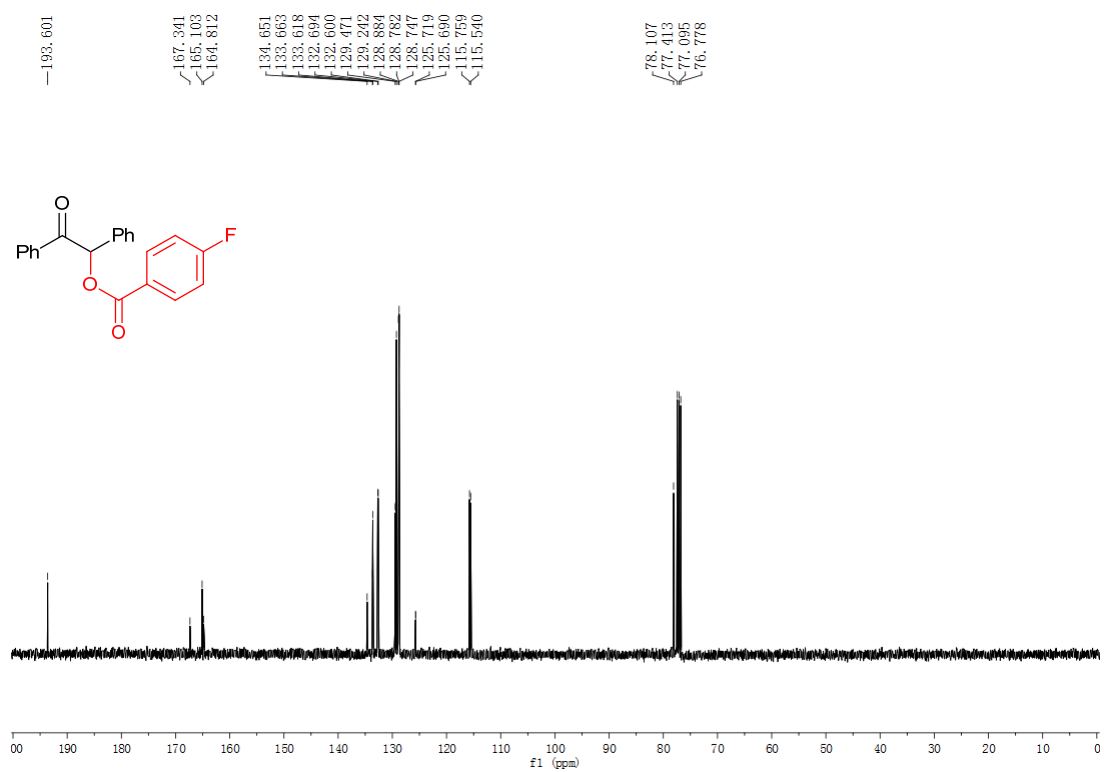

### 2-oxo-1,2-diphenylethyl 4-chlorobenzoate (3ag)

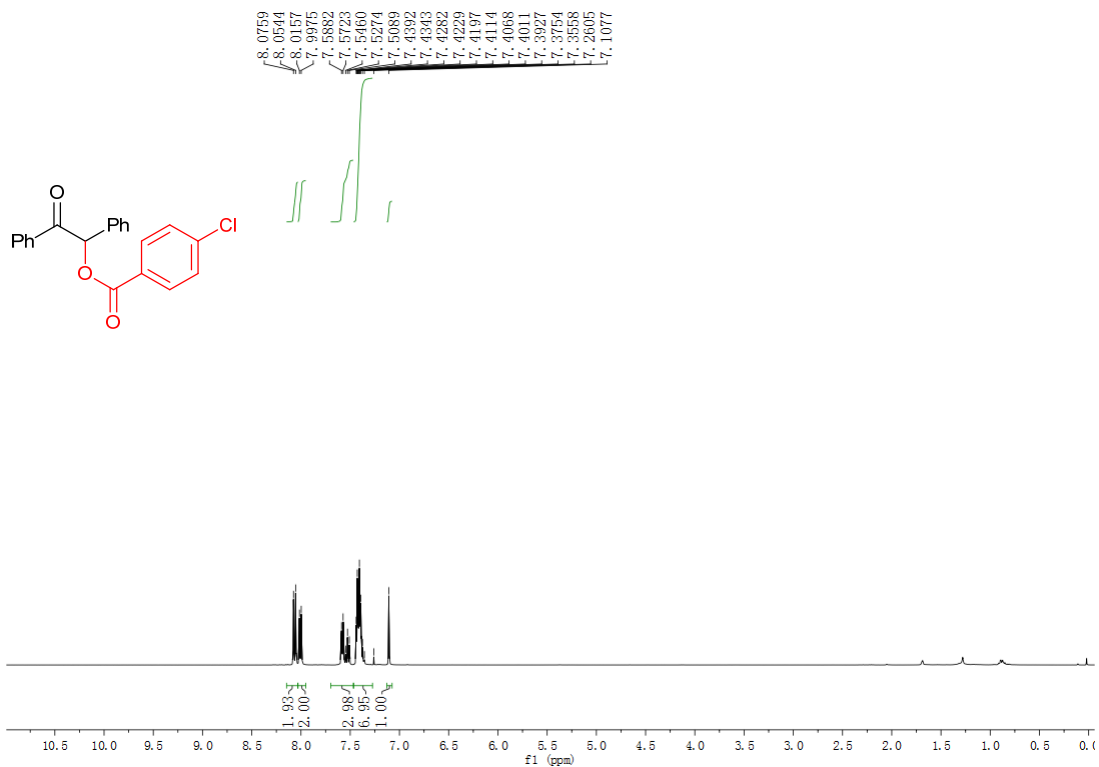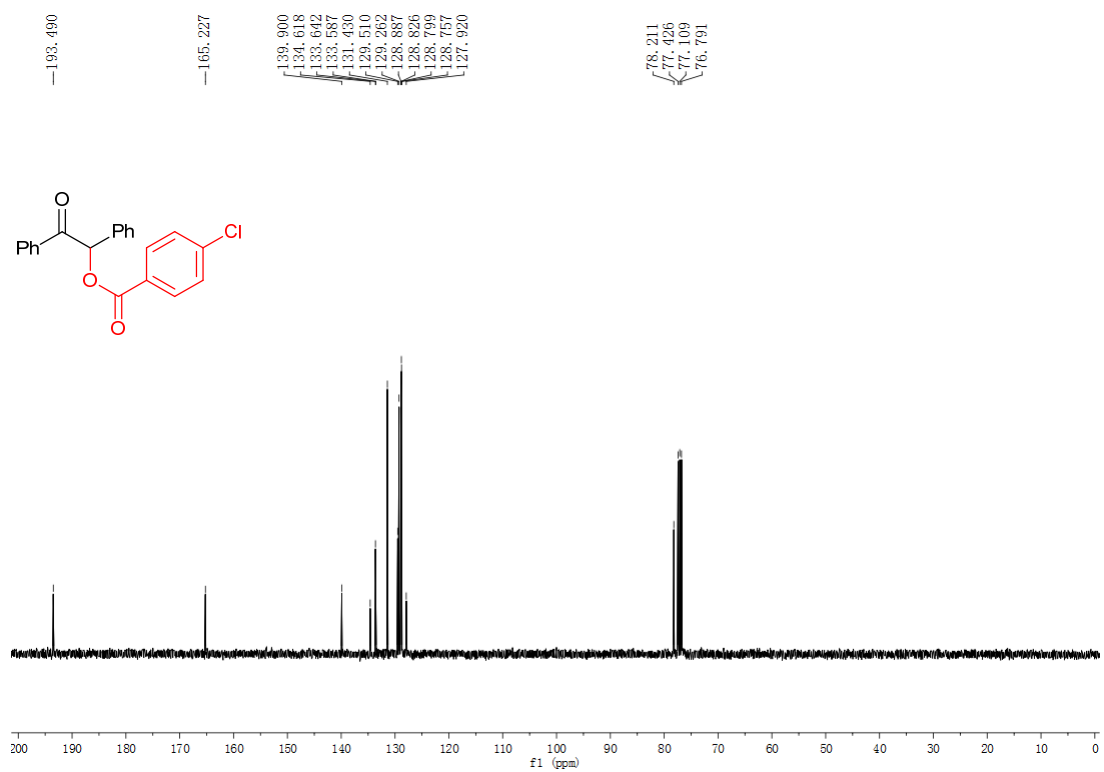



### 2-oxo-1,2-diphenylethyl 3-chlorobenzoate (3ah)

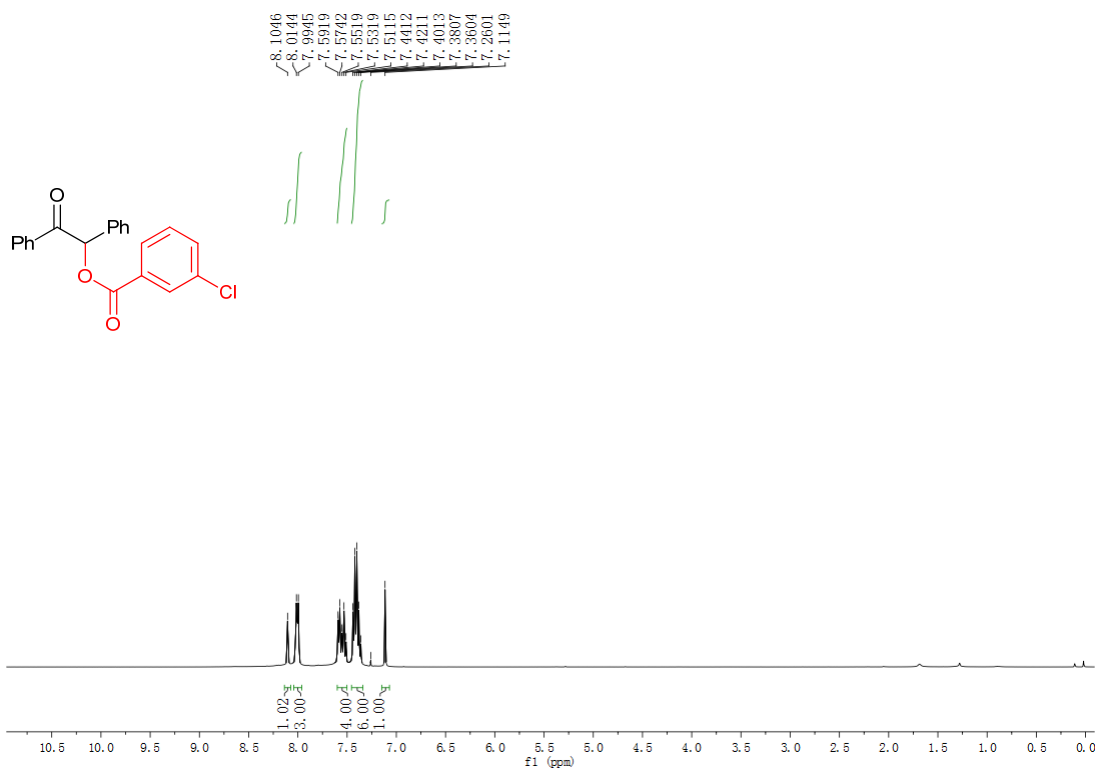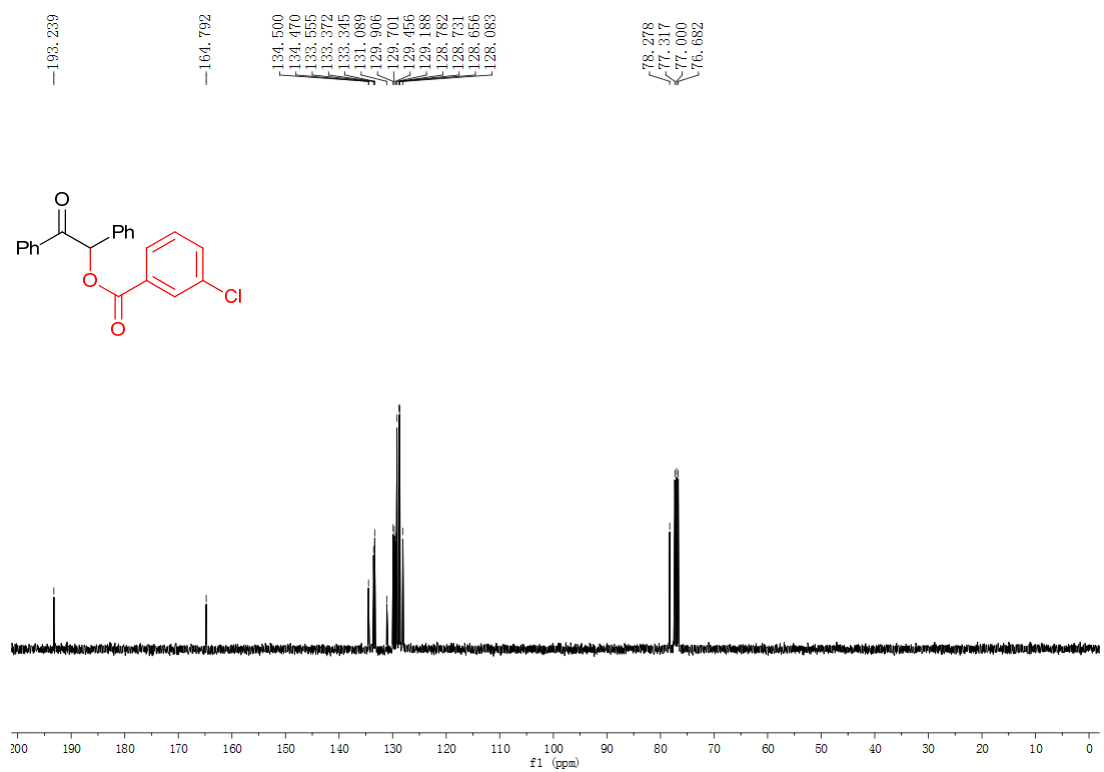

### 2-oxo-1,2-diphenylethyl 4-bromobenzoate (3ai)

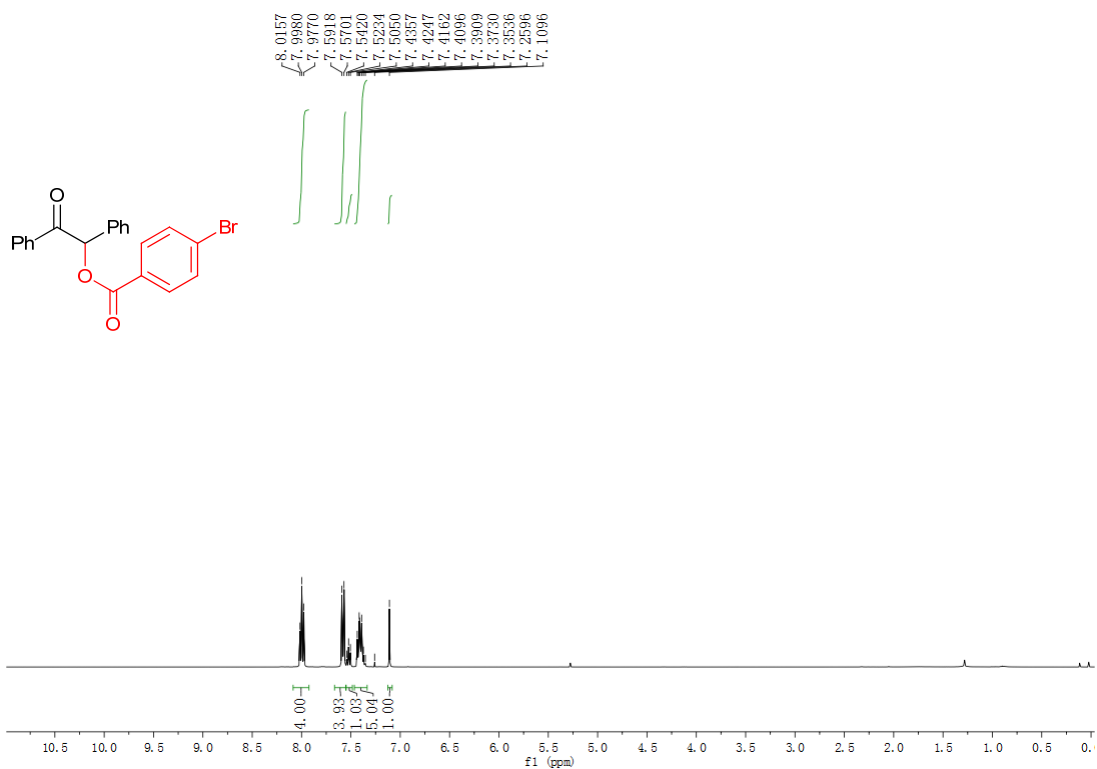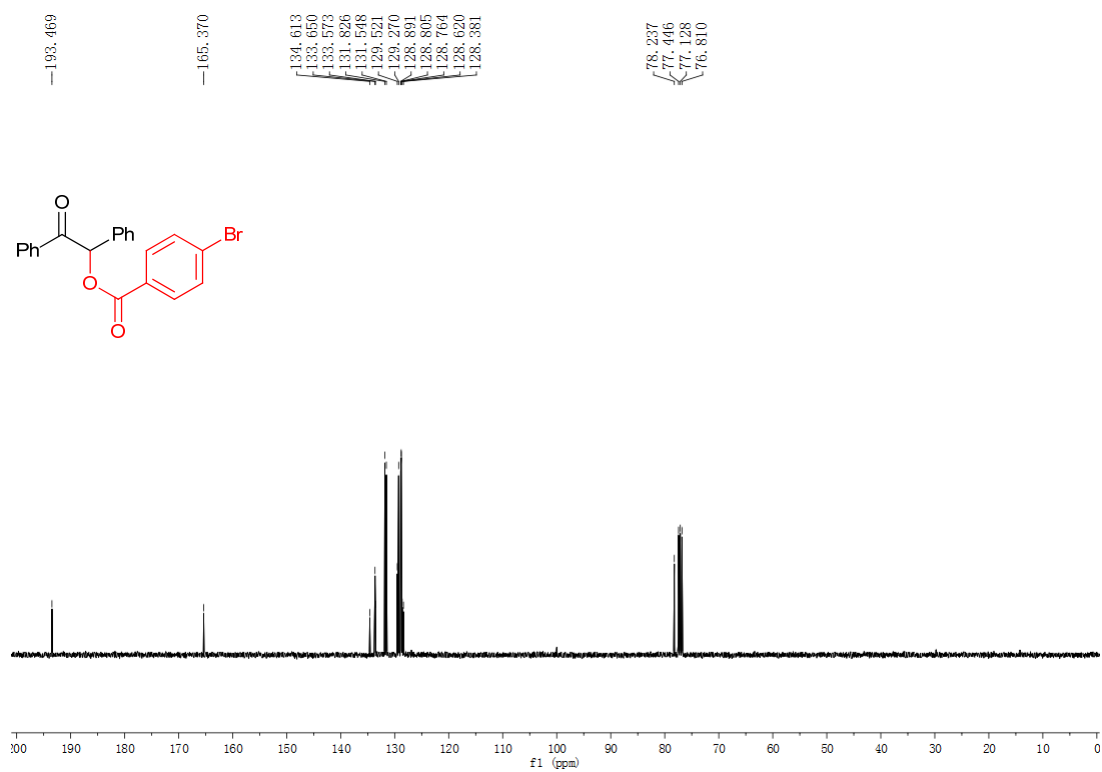

**2-oxo-1,2-diphenylethyl 4-(trifluoromethyl)benzoate (3aj)**

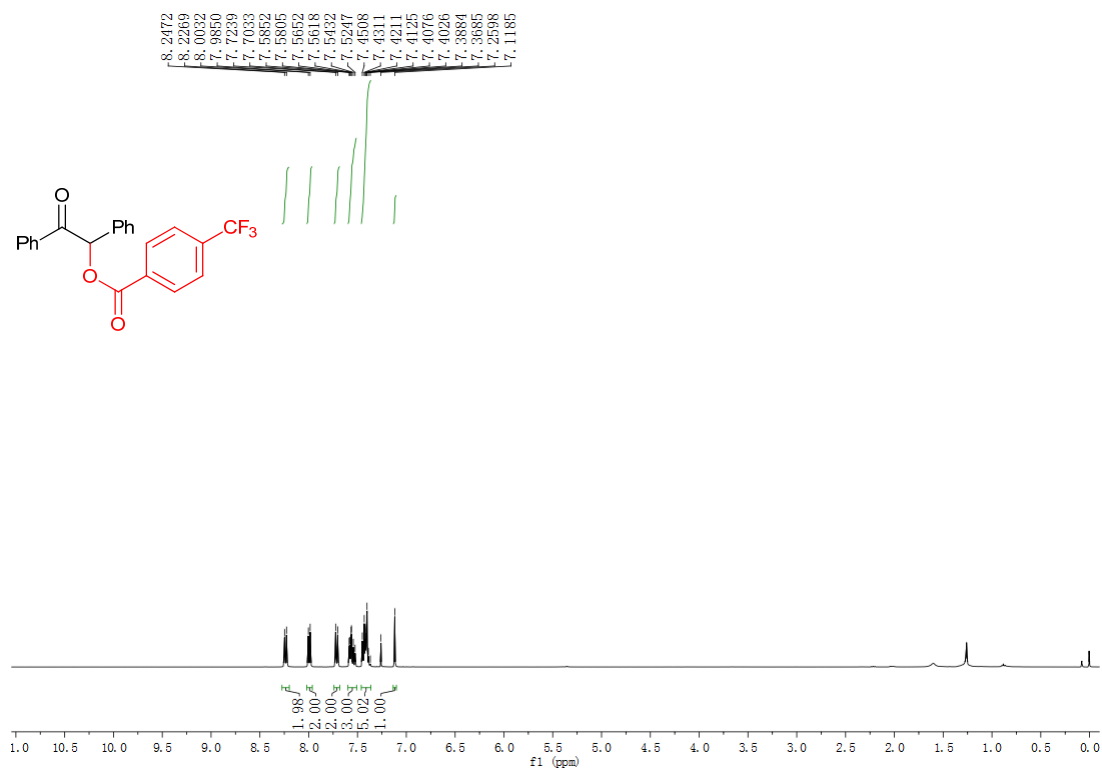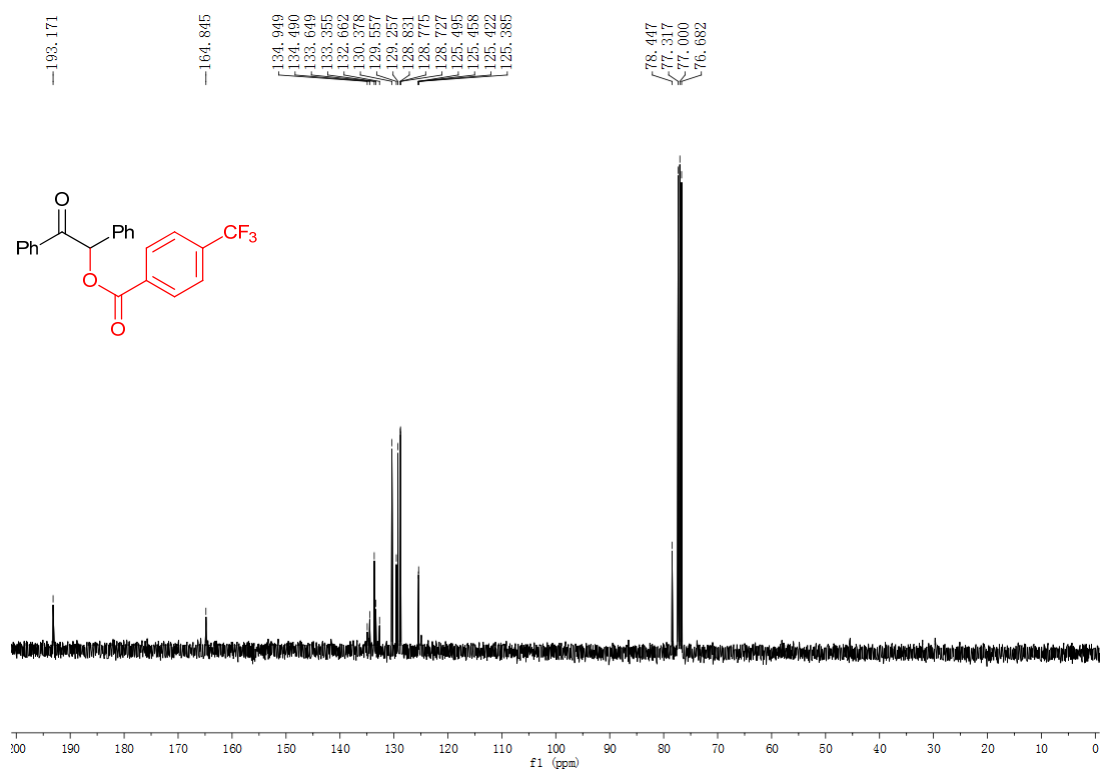

### 2-oxo-1,2-diphenylethyl 2-naphthoate (3ak)

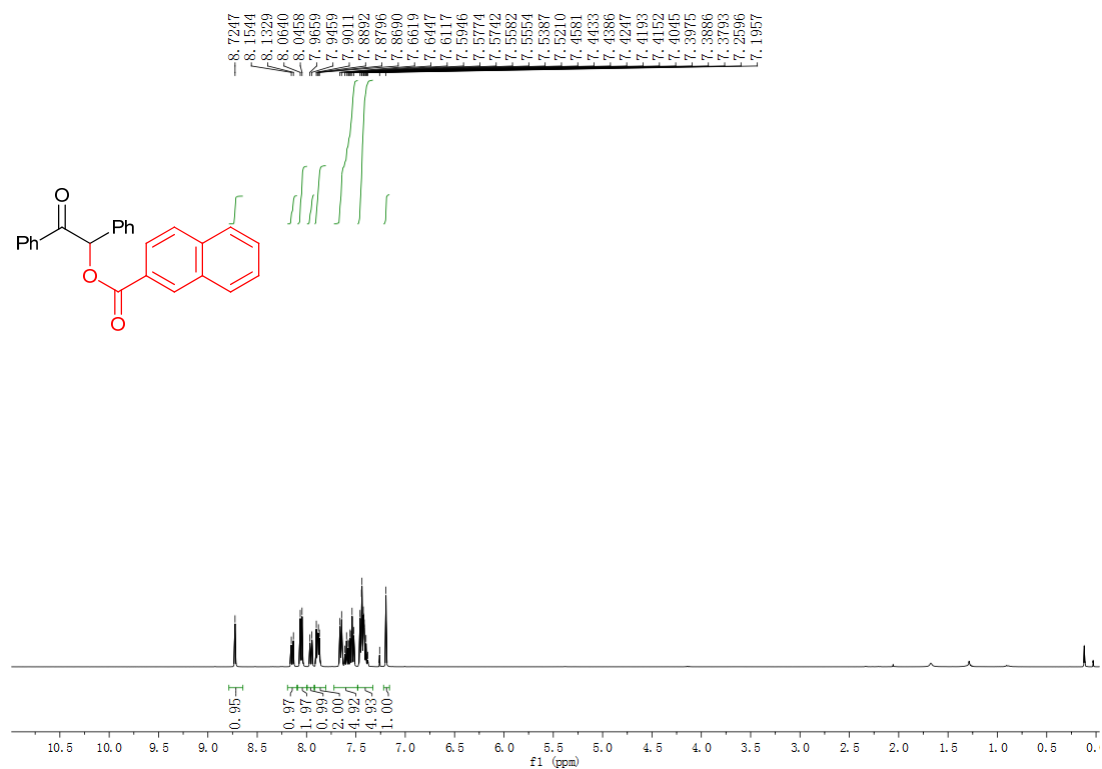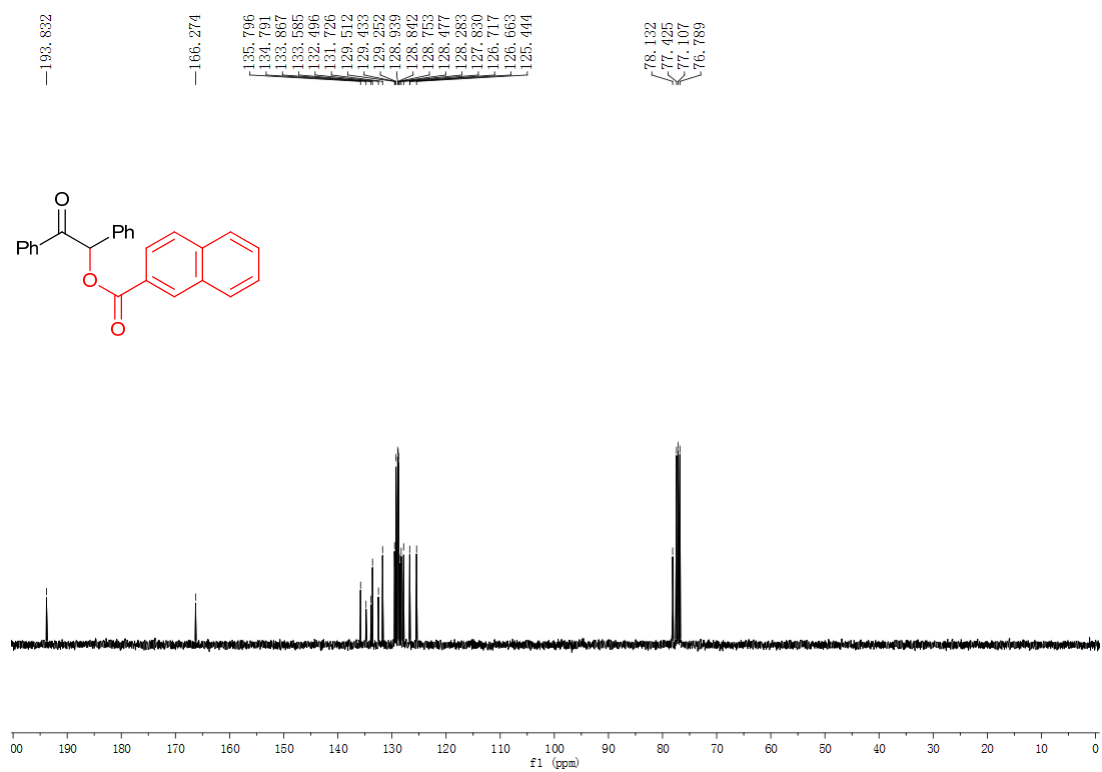

### 2-oxo-1,2-diphenylethyl thiophene-2-carboxylate (3a)

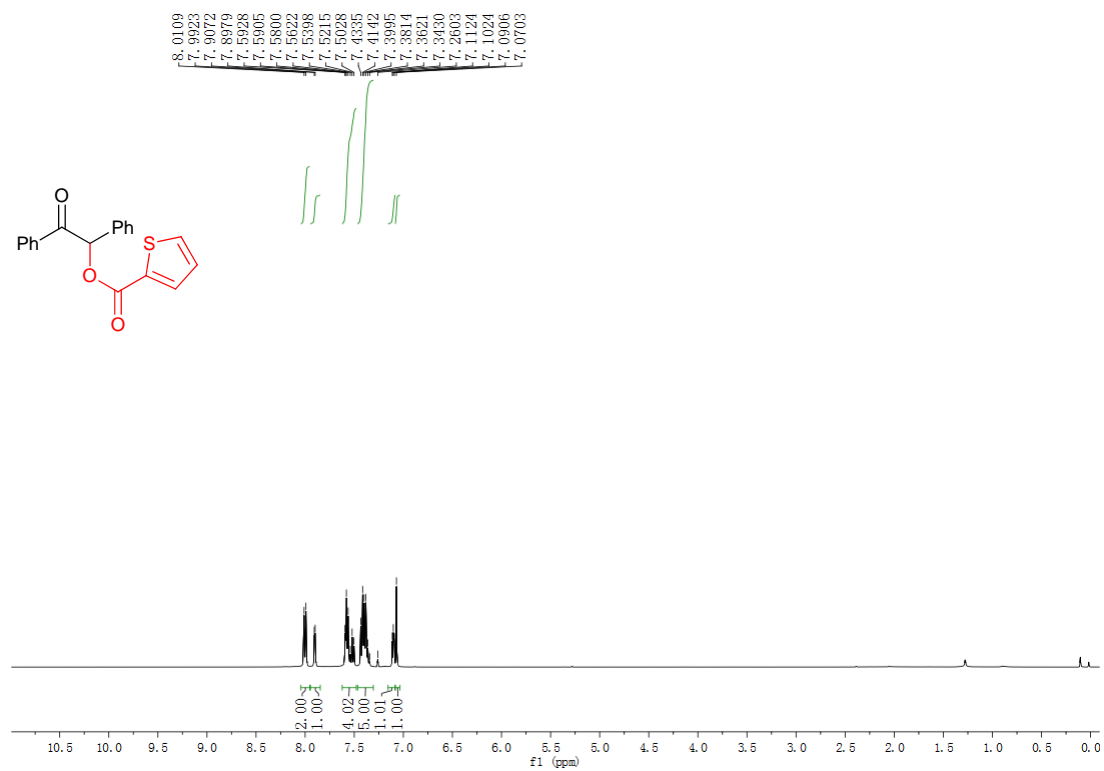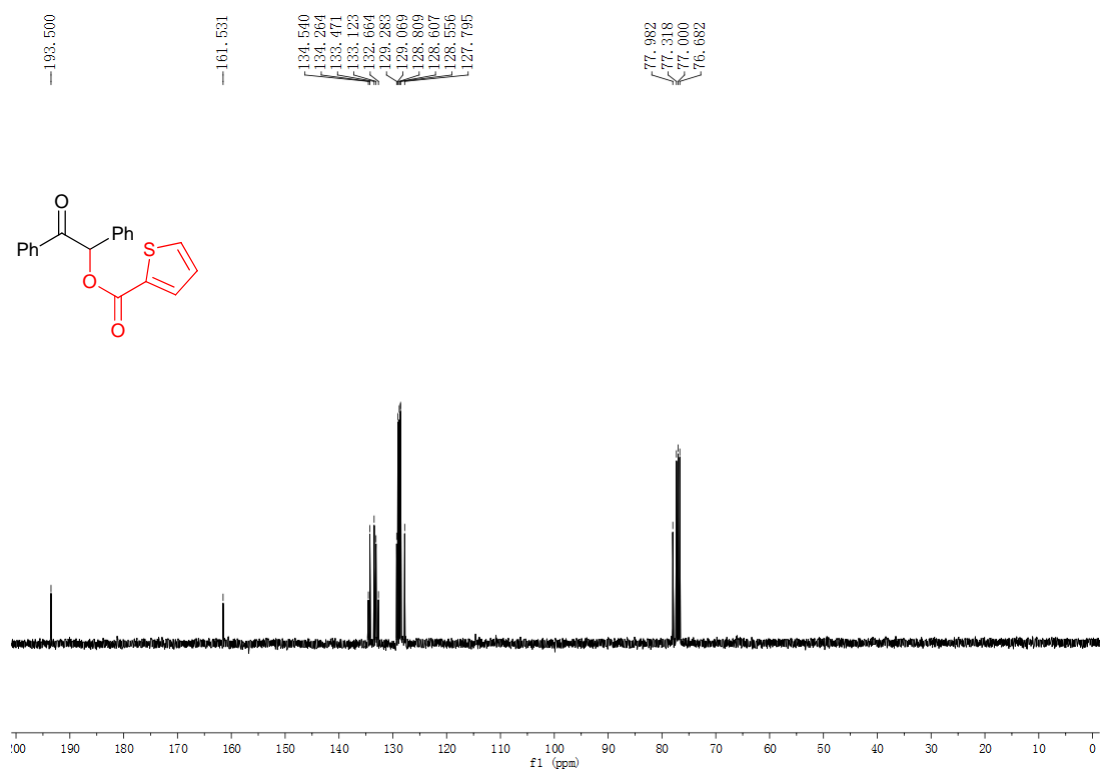

## 2-oxo-1,2-diphenylethyl decanoate (3am)

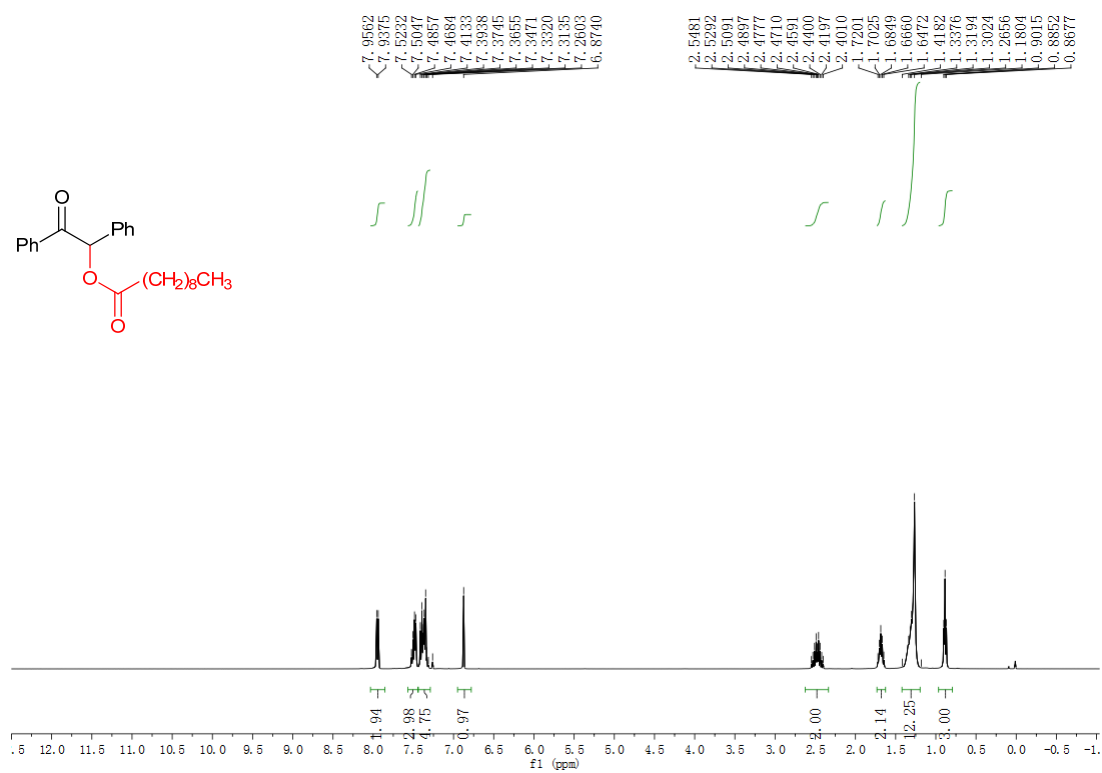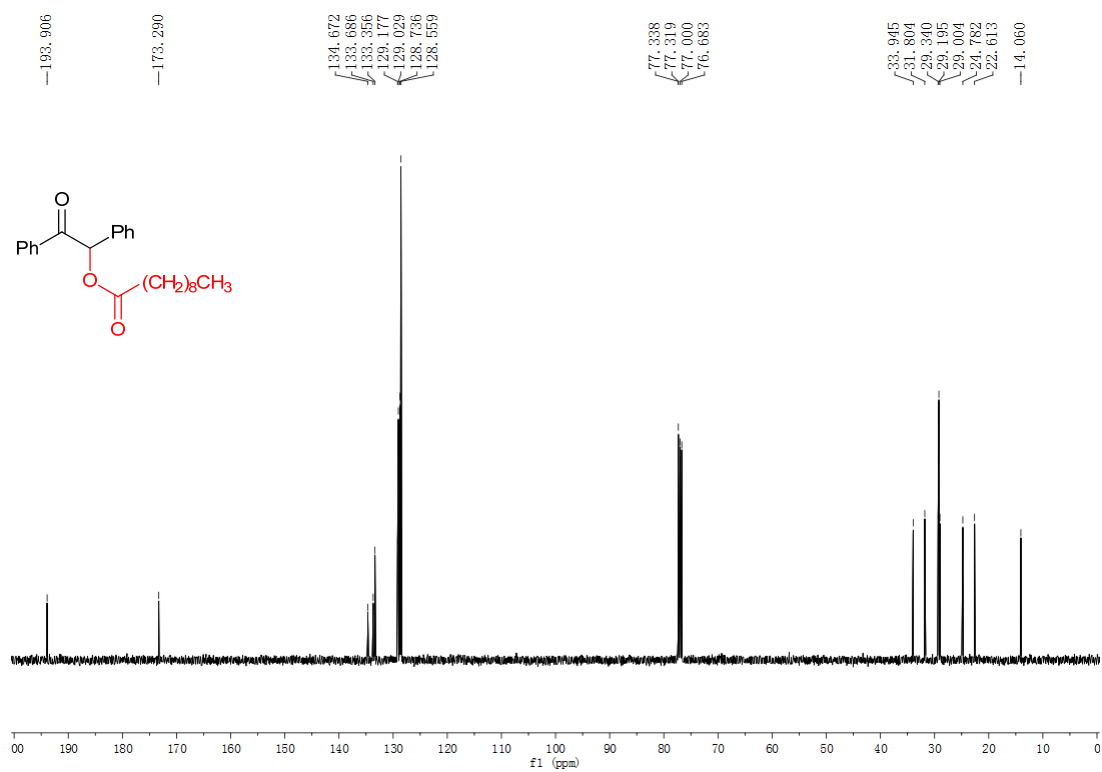

### 2-oxo-1,2-diphenylethyl stearate (3an)

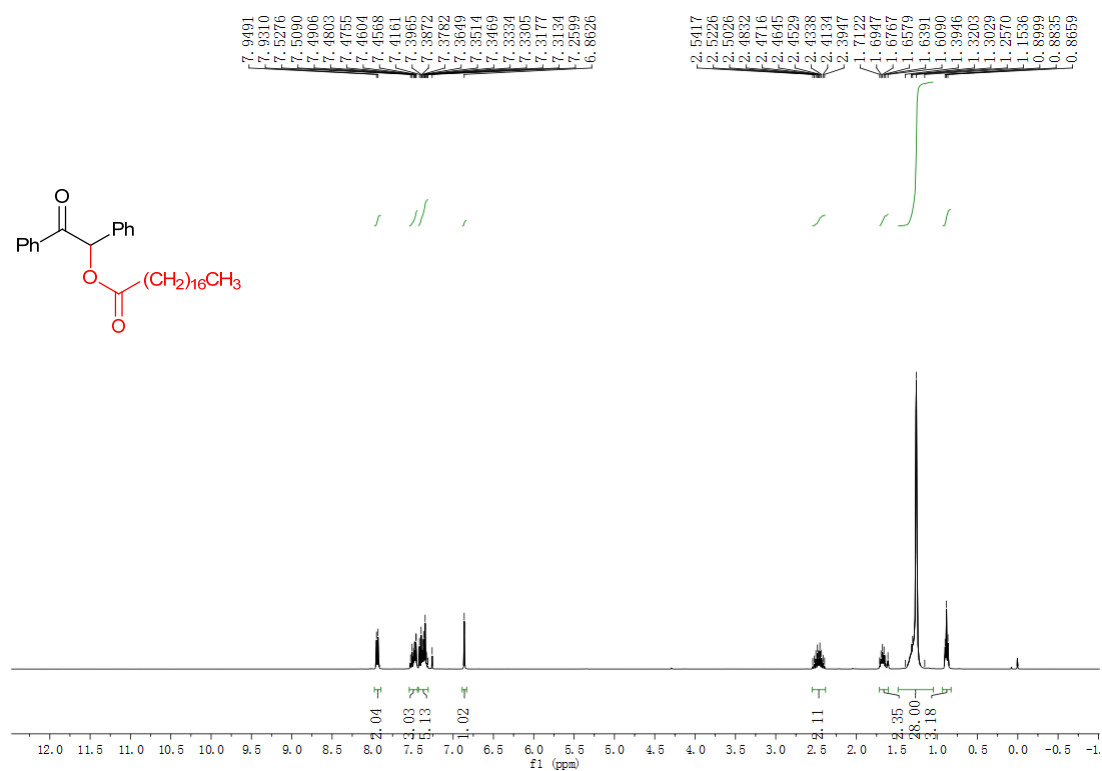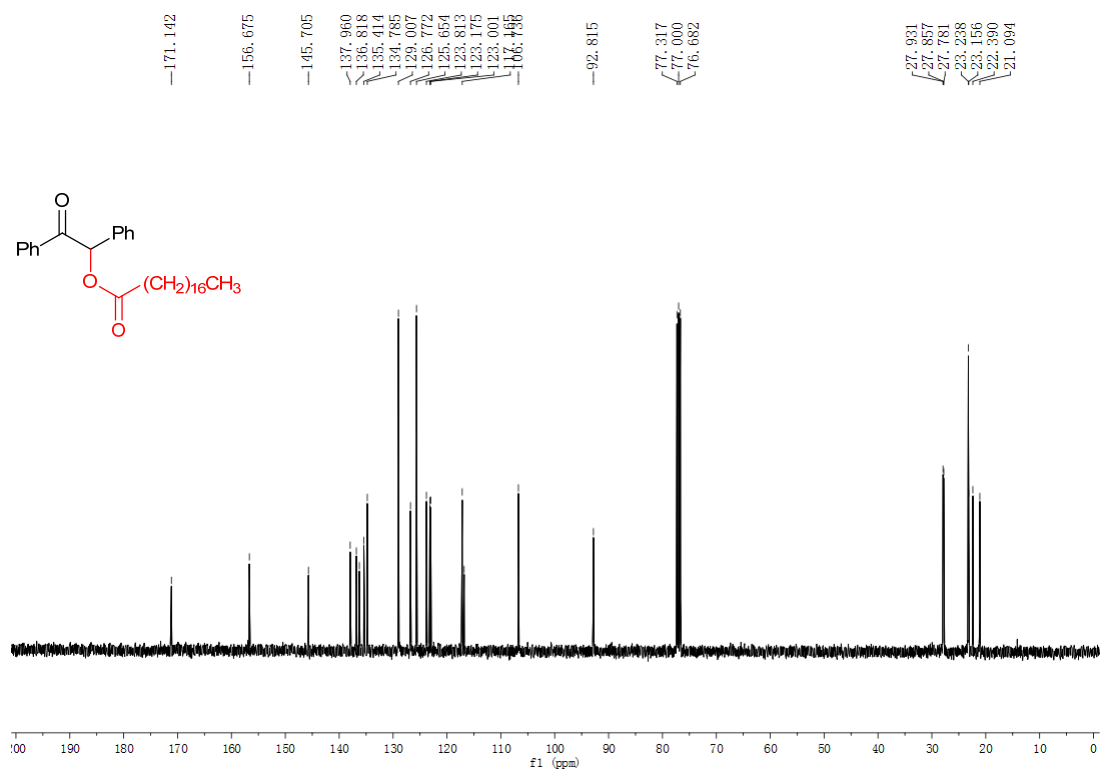

Supplement: c5ob01534k1.pdf [file c5ob01534k1.pdf]
